Invited review

## Signal transduction mechanisms controlling cardiac contractility and their alterations in chronic heart failure

Otto-Erich Brodde<sup>a,\*</sup>, Martin C. Michel<sup>c</sup>, Hans-Reinhard Zerkowski<sup>b</sup>

<sup>a</sup> Institute of Pharmacology and Toxicology Martin-Luther-University of Halle-Wittenberg, Magdeburger Str. 4, D-06097 Halle (Saale), Germany

<sup>b</sup> Department of Cardio-Thoracic Surgery, Martin-Luther-University of Halle-Wittenberg, D-06097 Halle (Saale), Germany

<sup>c</sup> Biochemical Research Laboratory, Department of Internal Medicine, University of Essen, Essen, Germany

Received 24 February 1995; accepted 9 August 1995

**Keywords:** Signal transduction; Heart failure; Contractile function; G-proteins

### 1. Introduction

The contractility and rate of the human heart are regulated by numerous neurotransmitters and hormones which act via specific membrane-bound receptors which in turn activate various intracellular signalling pathways. This article will focus on those receptor systems and their alterations in heart failure which signal via heterotrimeric GTP-binding regulatory proteins (G-proteins). Three types of receptor/G-protein complexes appear to be important in the human heart: Some receptor systems such as the  $\beta$ -adrenoceptors couple via  $G_s$  to the adenylyl cyclases to increase intracellular levels of cyclic AMP and to activate cAMP-dependent protein kinase (PKA); this may promote influx of extracellular  $Ca^{2+}$  through phosphorylation of calcium channels [1], thereby enhancing contraction, but may also lead to enhanced relaxation through increased calcium uptake in the sarcoplasmic reticulum via phosphorylation of phospholamban and by decreasing calcium sensitivity of troponin through phosphorylation of troponin I [2]; additionally  $G_{s\alpha}$  has been shown to be capable of directly activating L-type  $Ca^{2+}$  channels [3] and  $Na^+$ -channels [4] without involvement of cyclic AMP, but this is still a matter of controversy [5,6] and the physiological importance of these pathways for regulation of contractile force in the human heart remains to be determined. Other receptor systems such as the muscarinic acetylcholine receptors couple via  $G_i$  to the adenylyl cyclases to inhibit cyclic AMP formation and to activate certain potassium channels [7]. Finally, some receptor systems act independently of adenylyl cyclases by stimulating a phospholipase C via G-proteins of the  $G_{q/11}$  family. In the following we will first discuss the signalling properties of each of these systems in human heart and then their alterations in heart

failure. We will largely focus on  $\beta$ -adrenoceptors since they are the best-investigated receptor system in the human heart; however, alterations of  $\beta$ -adrenoceptor signalling in animal models of chronic heart failure will also be discussed briefly.

### 2. Receptor systems in the non-failing human heart

#### 2.1. $G_s$ -coupled receptors

In the human heart both isoforms of the  $\alpha$ -subunit of  $G_s$ ,  $G_{s\alpha long}$  ( $G_{s\alpha L}$ ) and  $G_{s\alpha short}$  ( $G_{s\alpha S}$ ) exist; while  $G_{s\alpha L}$  predominates in the human heart [8], the specific function of both isoforms is not fully understood, but both may undergo differential regulation [9]. In the human heart many receptors couple via  $G_s$  to the adenylyl cyclase/cyclic AMP system including  $\beta$ -adrenergic,  $H_2$ -histamine, 5-HT<sub>4</sub>-serotonin, VIP-, glucagon- and prostaglandin  $E_2$ -receptors. Whether each of these receptors is located on cardiomyocytes or whether some at least partly reside on non-myocyte cells of the heart is not fully clear. Thus, stimulation of  $\beta$ -adrenergic,  $H_2$ -, 5-HT<sub>4</sub>- and VIP-receptors can evoke positive inotropic effects (at least in isolated human myocardial preparations), but a clear-cut positive inotropic effect of glucagon and prostaglandin  $E_2$  in the human heart has not been demonstrated.

In the human heart both  $\beta_1$ - and  $\beta_2$ -adrenoceptors coexist; this has first been demonstrated by radioligand binding studies, and was subsequently confirmed in functional experiments [for reviews, see Refs. 10–12]. The number of  $\beta$ -adrenoceptors is quite evenly distributed in right and left atrial and ventricular tissue; however, the proportion of  $\beta_2$ -adrenoceptors is somewhat higher in the atria (approximately 30% of the total  $\beta$ -adrenoceptor pop-

\* Corresponding author. Tel.: (+49-345) 557 1773; fax: (+49-345) 557 1835.

Time for primary review 31 days.

ulation) than in ventricular myocardium (about 20% of the total  $\beta$ -adrenoceptor population) [see Refs. 12 and 13], and may be even higher (up to 50%) in the atrioventricular conducting system [14]. On the other hand,  $\beta_3$ -adrenoceptors have not been found in the human heart, either in functional [15] or in mRNA distribution studies on  $\beta_1$ -,  $\beta_2$ - and  $\beta_3$ -adrenoceptors [16,17].

Both  $\beta_1$ - and  $\beta_2$ -adrenoceptors couple to adenylyl cyclase and increase the intracellular amount of cyclic AMP [18–21]. Interestingly, in the human heart—in atria as well as in ventricular myocardium—adenylyl cyclase is preferentially activated by  $\beta_2$ -adrenoceptor stimulation although  $\beta_1$ -adrenoceptors predominate [for review, see Ref. 12]. The mechanism underlying these different coupling efficiencies of human cardiac  $\beta_1$ - and  $\beta_2$ -adrenoceptors to adenylyl cyclase is not known at present. However, when  $\beta_1$ - and  $\beta_2$ -adrenoceptors are transfected into the same cell line, the  $\beta_2$ -adrenoceptors exhibit a much greater functional coupling to adenylyl cyclase than the  $\beta_1$ -adrenoceptors [22,23]. Thus, it might be a general phenomenon that  $\beta_2$ -adrenoceptors couple more efficiently to adenylyl cyclase than  $\beta_1$ -adrenoceptors. It might, however, also be possible that the differences between efficiencies of  $\beta_1$ - and  $\beta_2$ -adrenoceptors to increase cyclic AMP in the human heart are due to compartmentalization of cyclic AMP production within the cardiomyocytes, since compartmentalization of cyclic AMP production has been demonstrated in various other mammalian cardiomyocytes [24–27].

In vitro experiments have convincingly shown that both  $\beta_1$ - and  $\beta_2$ -adrenoceptors can mediate positive inotropic effects of  $\beta$ -adrenoceptor agonists in isolated electrically driven atrial and ventricular preparations [for references, see Refs. 10–12, 20 and 28]; this has recently also been demonstrated in single myocytes from human ventricle [29]. In right and left atria  $\beta_1$ - and  $\beta_2$ -adrenoceptor stimulation can evoke maximum positive inotropic effects, while on right and left ventricles only  $\beta_1$ -adrenoceptor stimulation can evoke maximum positive inotropic effects,  $\beta_2$ -adrenoceptor stimulation only submaximal positive inotropic effects [20,30,31].

In vivo experiments in humans have confirmed that  $\beta_2$ -adrenoceptors can mediate positive chronotropic and inotropic effects of  $\beta$ -adrenoceptor agonists. Several studies have shown that isoprenaline-induced tachycardia in humans is mediated by both  $\beta_1$ - and  $\beta_2$ -adrenoceptors to about the same degree, while exercise-induced tachycardia (which is mainly due to neuronally released noradrenaline), is mediated solely by  $\beta_1$ -adrenoceptor stimulation [for references, see Refs. 12 and 32]—in close agreement with in vitro data on isolated human right atria [20,31].

Moreover, in healthy volunteers the positive chronotropic effect caused by intravenous infusions of terbutaline was only marginally affected by the  $\beta_1$ -adrenoceptor selective antagonists atenolol and bisoprolol given in doses that markedly inhibited  $\beta_1$ -adrenoceptor-mediated effects [33–35]. Finally, Hall et al. [36] have demonstrated that the positive chronotropic effect of salbutamol upon injections into the right coronary artery of patients with chronic stable angina (thereby avoiding any systemic effects) was not affected by the  $\beta_1$ -adrenoceptor selective antagonist

practolol, but was significantly antagonized by propranolol, indicating that it is mediated exclusively by (cardiac)  $\beta_2$ -adrenoceptor stimulation. It is interesting to note, however, that—in contrast to the in vitro data [20,31]—adrenaline appears to cause its positive chronotropic effect in vivo solely via (cardiac)  $\beta_2$ -adrenoceptor stimulation. Thus, several authors have shown that adrenaline-induced tachycardia is not affected by  $\beta_1$ -selective antagonists such as metoprolol [37], atenolol [38] or bisoprolol [39], but is completely abolished by the  $\beta_2$ -selective antagonist ICI 118,551 [40], or by the non-selective  $\beta$ -adrenoceptor antagonist propranolol [39].

Using the  $\beta_2$ -adrenoceptor agonist terbutaline, two groups have convincingly shown that cardiac  $\beta_2$ -adrenoceptors can also mediate positive inotropic effects in vivo [34,35]. Moreover, Schäfers et al. [35] recently compared in healthy volunteers the positive chrono- and inotropic effects induced by infusions of isoprenaline and terbutaline; they found that at doses that caused the same increase in heart rate isoprenaline caused larger positive inotropic effects than did terbutaline—in close agreement with the in vitro observation (see above) that in human right atrium both  $\beta_1$ - and  $\beta_2$ -adrenoceptors cause maximal positive inotropic effects while in the ventricular myocardium only  $\beta_1$ -adrenoceptor stimulation caused maximal positive inotropic effects,  $\beta_2$ -adrenoceptor stimulation evoked only submaximal positive inotropic effects.

In this context it is interesting to note that in transgenic mice overexpression of the  $\beta_2$ -adrenoceptor specifically in the heart resulted in marked elevation of baseline heart rate and contractility [41]; the extent of this increase was comparable with that induced by maximal isoprenaline stimulation in control mice; in addition, increases in baseline heart rate and contractility persisted in transgenic mice pretreated with reserpine [41], thus depleting endogenous catecholamine stores. On the other hand, overexpression of the human  $\beta_1$ -adrenoceptor in atria of transgenic mice did not show considerable changes in contractility [42]. These differences could be due to the amount of overexpression; they could, however, also be due to the lower efficiency of the  $\beta_1$ -adrenoceptor in coupling to adenylyl cyclase when compared with the  $\beta_2$ -adrenoceptor (see above). Moreover, in the transgenic mice with overexpressed  $\beta_2$ -adrenoceptors, but not in the control mice, the  $\beta_2$ -adrenoceptor antagonist ICI 118,551 significantly decreased basal heart rate and contractility, demonstrating for the first time in vivo that part of the  $\beta$ -adrenoceptor is constitutively active, even in the absence of  $\beta$ -adrenoceptor agonists. Such agonistic activity of “empty”  $\beta$ -adrenergic receptors and its reversal by certain  $\beta$ -adrenoceptor antagonists has been recently shown in several cell culture systems [43–45] including human cardiomyocytes [46], a phenomenon named “inverse agonism” [47].

In addition to  $\beta$ -adrenoceptors at least three other receptor systems exist in the human heart that couple via  $G_s$  to adenylyl cyclase and can mediate positive inotropic effects: the histamine  $H_2$ -receptor, the serotonin 5-HT<sub>4</sub>-receptor and the VIP-receptor. Compared with  $\beta$ -adrenergic stimulation, however, stimulation of these three receptors causes only submaximal activation of adenylyl cyclase in atrial ( $H_2$ , 5-HT<sub>4</sub>) and ventricular ( $H_2$ , VIP) membrane

preparations from non-failing human heart [48–54]. Similarly, positive inotropic responses of isolated electrically driven ventricular preparations from non-failing human heart to histamine and VIP were only 30–40% of those evoked by isoprenaline [49,54–56] while in human right atrial tissue the histamine response was only slightly less than that of isoprenaline [50]. Interestingly, the 5-HT<sub>4</sub>-receptor appears to mediate (submaximal, about 25–55% of that of isoprenaline) positive inotropic effects only in human right [50–52,57,58] and left atria [53], but not in ventricular myocardium [57,58], indicating that the ventricular myocardium may lack functional 5-HT<sub>4</sub>-receptors.

Thus, in the human heart multiple receptor systems increase cyclic AMP concentrations and activate PKA, but the  $\beta$ -adrenoceptor is by the far the most effective receptor in inducing positive inotropic effects with all other G<sub>s</sub>-coupled receptors causing only 30–60% of the maximal positive inotropic effect induced by  $\beta$ -adrenergic agonists (Fig. 1). It should be noted, however, that in the human heart there exists only a small receptor reserve for  $\beta$ -adrenoceptor-mediated positive inotropic effects. This was initially suggested by Kaumann et al. [59] and Bristow et al. [60] based on the comparison of affinity estimates and inotropic potency estimates for catecholamines and has been subsequently confirmed and extended by Schwinger et al. [61]

and Brown et al. [62]. Interestingly, we recently observed [50] that in human right atrium histamine (acting at H<sub>2</sub>-receptors) and serotonin (acting at 5-HT<sub>4</sub>-receptors) stimulated adenylyl cyclase activity with a potency that was nearly identical to their respective positive inotropic potencies, indicating that also for these (G<sub>s</sub>/adenylyl-cyclase-coupled) receptors only a few spare receptors exist although their true affinities (because of lack of suitable radioligands) have not been assessed in the human heart. Thus, it might be speculated that in the human heart G<sub>s</sub>-adenylyl-cyclase-coupled receptors might have in general only a small receptor reserve, and hence alterations of their signal transduction in heart failure can be expected to directly affect their ability to elicit inotropic responses.

## 2.2. G<sub>i</sub>-coupled receptors

The major isoform of human cardiac G<sub>i</sub>  $\alpha$ -subunits is G<sub>i $\alpha$ -2</sub>; in addition, G<sub>i $\alpha$ -3</sub> has been demonstrated while G<sub>i $\alpha$ -1</sub> appears to be absent, at least at the mRNA level [for a recent review, see Ref. 63]. At least three receptor systems exist in the human heart that couple to G<sub>i</sub>: muscarinic M<sub>2</sub>-, adenosine A<sub>1</sub>- and somatostatin-receptors. All three receptor systems have been shown to inhibit adenylyl cyclase activity [64–68] and at least M<sub>2</sub>- and A<sub>1</sub>-receptors

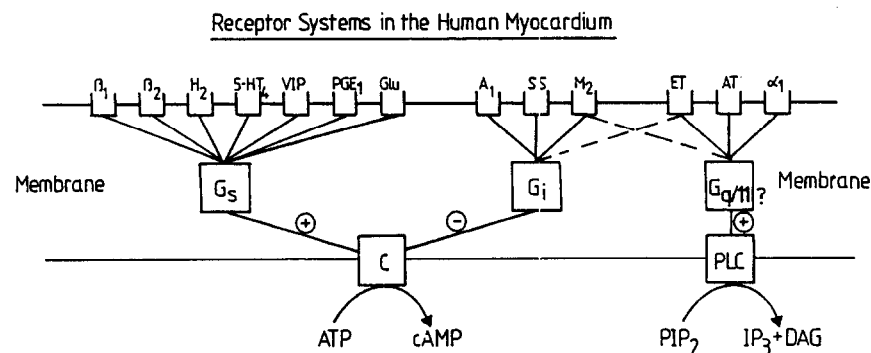

### Positive Inotropic Effect (% of Isoprenaline-Maximum)

|                   | Right Atrium | Ventricular Myocardium |
|-------------------|--------------|------------------------|
| $\beta_1$         | 100          | 100                    |
| $\beta_2$         | 90–100       | 30–50                  |
| H <sub>2</sub>    | 80–85        | 30–40                  |
| 5-HT <sub>4</sub> | 25–55        | 0                      |
| VIP               | ???          | 40                     |
| PGE <sub>1</sub>  | ???          | ???                    |
| Glu               | ???          | ???                    |
| $\alpha_1$        | 15–25        | 15–45                  |
| ET                | 35–45        | 20                     |
| AT                | 30–45        | 0                      |

Fig. 1. Receptor systems and their signal-transduction mechanisms in the non-failing human heart. For details, see text. Abbreviations:  $\beta_1$ ,  $\beta_2$ ,  $\alpha_1 = \beta_1$ -,  $\beta_2$ - and  $\alpha_1$ -adrenoceptors; H<sub>2</sub> = histamine H<sub>2</sub>-receptors; 5-HT<sub>4</sub> = 5-HT<sub>4</sub>-serotonin receptors; VIP = vasoactive intestinal peptide receptors; PGE<sub>1</sub> = prostaglandin E<sub>1</sub> receptors; Glu = glucagon receptors; A<sub>1</sub> = adenosine A<sub>1</sub>-receptors; SS = somatostatin receptors; M<sub>2</sub> = muscarinic M<sub>2</sub>-receptors; ET = endothelin receptors; AT = angiotensin II receptors; G<sub>s</sub> = stimulatory guanine nucleotide binding protein; G<sub>i</sub> = inhibitory guanine nucleotide binding protein; G<sub>q/11(?)</sub> = the guanine nucleotide binding protein that presumably couples ET-, AT- and  $\alpha_1$ -adrenergic receptors to PLC; C = catalytic unit of adenylyl cyclase; PLC = phospholipase C; PIP<sub>2</sub> = phosphatidylinositol 4,5-bisphosphate; DAG = 1,2-diacylglycerol; IP<sub>3</sub> = inositol-1,4,5-triphosphate; + = activation; - = inhibition. Right atrium: positive inotropic effects were determined on isolated electrically-driven right atria from patients without apparent heart failure undergoing coronary artery bypass grafting. Ventricular myocardium: positive inotropic effects were determined on isolated electrically-driven right and left ventricular preparations obtained from would-be cardiac transplant donors.

can cause negative inotropic effects. However, differences exist in their mode of action in atria and ventricles: in atria acetylcholine and adenosine can cause negative inotropic effects in the absence of other transmitters, presumably by directly opening a potassium channel to cause hyperpolarization that leads to negative inotropic effects, and can also reduce inotropic effects elicited by cyclic-AMP-elevating agents [69–71]. In ventricular myocardium, however, they can only reduce the force of contraction elicited by cyclic-AMP-elevating agents [65,66,72–76]. The reason for these different effects in atrial and ventricular myocardium is not known at present but could possibly be related to the existence of different potassium channels in atria and ventricles and/or to the fact that the densities of  $M_2$ - and  $A_1$ -receptors in human atria is about twofold higher than in the ventricles [74,75,77]. In addition, it is still a matter of debate whether the reduction of inotropic effects of cyclic-AMP-elevating agents by acetylcholine and adenosine is mediated via  $G_i$ -mediated inhibition of cyclic AMP elevation [for references, see Refs. 63, 69 and 71].

Somatostatin can inhibit human cardiac adenylyl cyclase activity [68]. However, somatostatin does not exert a negative inotropic effect on human atrial and ventricular myocardium pre-stimulated with noradrenaline but was found to significantly reduce basal force of contraction in atria, but not in ventricles [76]. Thus, further studies have to show whether somatostatin may play a physiological role in regulation of human cardiac contractility and/or heart rate.

### 2.3. Receptor systems signalling independent of the cyclic AMP system

In addition to the receptor systems that cause positive inotropic effects through elevation of intracellular cyclic AMP, some receptor systems in the human heart can elicit positive inotropic effects independently of cyclic AMP such as  $\alpha_1$ -adrenoceptors, endothelin receptors and angiotensin II  $AT_1$ -receptors; moreover, under certain experimental conditions  $M_2$ -receptors increase force of contraction. Among these the most intensively studied receptor is the  $\alpha_1$ -adrenoceptor. Numerous studies have clearly demonstrated that in the heart of various species including man  $\alpha_1$ -adrenoceptors exist that can cause positive inotropic effects without changes in the intracellular levels of cyclic AMP in vitro [78–81] and in vivo [82,83]. The number of cardiac  $\alpha_1$ -adrenoceptors varies markedly between species, being quite high in rat and very low in man [84–86]. Nevertheless, in the human heart  $\alpha_1$ -adrenoceptor-mediated positive inotropic effects have been demonstrated in atrial [87–89] and ventricular preparations [86,90–92]. The mechanism of  $\alpha_1$ -adrenoceptor-mediated inotropic effects is still a matter of debate:  $\alpha_1$ -adrenoceptors couple via a pertussis toxin (PTX)-insensitive G-protein (possibly  $G_{q/11}$ ) to phospholipase C [93,94]. This causes formation of 1,4,5-inositoltrisphosphate ( $IP_3$ ) and diacylglycerol (DAG) with the former mediating the release of  $Ca^{2+}$  from intracellular stores which might be involved in increases in force of contraction. In addition,  $\alpha_1$ -adrenoceptor stimulation increase the  $Ca^{2+}$ -sensitivity of myofilaments, transsarcolemmal  $Ca^{2+}$ -influx and intra-

cellular alkalization via activation of the  $Na^+/H^+$ -antiporter and it has been suggested that these effects are—at least partly—due to DAG-induced activation of PKC [for recent reviews, see Refs. 81, 95 and 96]. Among the three known  $\alpha_1$ -adrenoceptor subtypes ( $\alpha_{1A}$ ,  $\alpha_{1B}$  or  $\alpha_{1D}$  [97]) the  $\alpha_{1A}$ -adrenoceptor (formerly called  $\alpha_{1C}$ ) appears to dominate at the mRNA level [98,99], but whether this reflects the situation at the protein level is unclear.

Recently endothelin and angiotensin II have also been found to couple to the phospholipase C pathway and cause positive inotropic effects in the human heart. Based on radioligand binding studies the human heart contains endothelin receptors of the  $ET_A$ - and  $ET_B$ -subtype [100,101] and angiotensin II receptors of the  $AT_1$ - and  $AT_2$ -subtypes [102]. However, the endothelin- and angiotensin II-induced formation of inositol phosphates in human right atrial slices appears to involve only  $ET_A$ - and  $AT_1$ -receptors because endothelin-1 was 100-fold more potent than endothelin-3 [103] and because the angiotensin II effect was completely abolished by the  $AT_1$ -receptor antagonist losartan [50], respectively. Endothelin causes positive inotropic effects in atrial and ventricular preparations of the human heart [50,104–108]; at least in human right atrium this effect appears to result from activation of PKC with a subsequent activation of the  $Na^+/H^+$ -antiporter [108]. On the other hand, positive inotropic effects evoked by angiotensin II have consistently been found only in atria [50,76,109,110] while ventricular preparations showed no [76,110] or only inconsistent positive inotropic effects [109], possibly due to the fact that in ventricular myocardium the number of AT-receptors is rather low and the  $AT_2$ -subtype predominates [102].

Interestingly  $ET_A$ -receptors in adult rat cardiomyocytes [111] and human right atrium [103] but not in human left atrium and left ventricular myocardium [Brodde, unpublished observations] couple also to inhibition of adenylyl cyclase—very likely via  $G_i$ . This might explain the transient small negative inotropic effect preceding the positive inotropic effect that is observed with endothelin on isolated cardiac preparations [103,108,112,113]. In the heart of various mammalian species including humans muscarinic  $M_2$ -receptors (similar to  $ET_A$ -receptors) can couple to inhibition of adenylyl cyclase (see above) and to activation of phospholipase C. Thus, high concentration of carbachol ( $> 10^{-6}$  M) can increase formation of inositol phosphates and cause positive inotropic effects; this effect is PTX-insensitive, indicating that it does not occur via  $G_i$ , and the positive inotropic effects are enhanced after PTX-pretreatment [76,114–116].

Finally, besides mediating positive inotropic effects some of the receptor systems present in human heart can also induce cardiac growth and may be, therefore, involved in hypertrophic responses. On isolated cardiac myocytes a direct effect on protein synthesis has been demonstrated for the phospholipase-C-coupled  $\alpha_1$ -adrenergic, endothelin  $ET_A$ - and angiotensin II  $AT_1$ -receptors and it has been suggested that activation of phospholipase C and PKC may be essential for these responses [117–122]. Moreover, myocardial overexpression of a constitutively active  $\alpha_{1B}$ -adrenergic receptor mutant (a mutant that was capable of activating PLC in an agonist-independent manner) in trans-

genic mice caused marked cardiac hypertrophy [123]. Whether these effects might also occur in the human heart remains to be elucidated, but the fact that angiotensin converting enzyme inhibitors reduce cardiac hypertrophy more effectively than other antihypertensive drugs in hypertensive patients [124] indicates this may also be the case in vivo.

### 3. Changes in human cardiac receptor systems in chronic heart failure

#### 3.1. $G_s$ -coupled receptors

Heart failure is a disease state that is primarily characterized by inadequate perfusion of peripheral organs and pulmonary and venous congestion. This is associated with activation of various neurohumoral systems including the renin–angiotensin system and the sympathetic nervous system. On the other hand, the cardiac responsiveness to neurohumoral stimulation is markedly altered in heart failure. Among receptor systems present in the human heart, this has been best investigated for the  $\beta$ -adrenoceptor–G-protein–adenylyl cyclase system. Bristow et al. [60] were the first to report that  $\beta_1$ -adrenoceptor number is decreased in patients with chronic failure of different etiology. Numerous studies have confirmed and extended this finding and demonstrated that it occurs with all etiologies of heart failure and that the extent of reduction in  $\beta$ -adrenoceptor number is directly related to the severity of the disease, often judged by NYHA classification [for recent reviews, see Refs. 116, 125 and 126]. While there is general agreement that  $\beta_2$ -adrenoceptor function (i.e., induction of positive inotropic effects) is also decreased in patients with chronic heart failure, it is still controversial whether  $\beta_2$ -adrenoceptor number decreases [10–12, 116, 125, 126]. Thus, reduced  $\beta_1$ -adrenoceptor numbers have been reported in all studies, whereas decreased  $\beta_2$ -adrenoceptors were found in some and unchanged numbers in others. Some data indicate that these differences may possibly depend on the etiology of the disease.

Due to the high sympathetic tone in chronic heart failure, it has frequently been assumed that cardiac  $\beta$ -adrenoceptor desensitization is a form of agonist-induced desensitization. Studies on agonist-induced desensitization of  $\beta$ -adrenoceptors in other models [for a recent review, see Ref. 127] have indicated various possible molecular mechanisms:

- (1) Phosphorylation of the receptor by the enzyme  $\beta$ -adrenoceptor kinase ( $\beta$ ARK) which recognizes receptors only if they are occupied by agonists and enhances the binding of the inhibitor protein  $\beta$ -arrestin which inhibits interaction of the receptor with the  $G_s$ -protein; since this can occur only with agonist-occupied receptors, this mechanism is mainly implicated in homologous desensitization.
- (2) Phosphorylation of the receptor by PKA and possibly by PKC; the desensitizing effect of phosphorylation by PKA or PKC does not require the binding of  $\beta$ -arrestin and may be involved in homologous and heterologous (PKA) or in heterologous desensitization only (PKC). There

are two major differences between  $\beta$ ARK- and PKA-induced desensitization:  $\beta$ ARK-induced phosphorylation is considerably faster than PKA-induced effects, and  $\beta$ ARK-induced phosphorylation requires much higher agonist concentrations than does PKA phosphorylation.

- (3) Transient internalization of the receptors into a still unknown intracellular compartment where they are not accessible to hydrophilic ligands such as catecholamines. These internalized receptors remain functionally intact and can be recycled.

- (4) Down-regulation of the receptors (i.e., a decrease in the total number of receptors). This can be caused either by enhanced degradation of the receptors and/or by diminished synthesis.

- (5) Uncoupling of the receptors from their G-proteins, which may be a consequence of one of the above events.
- (6) Altered expression of G-proteins (e.g., decreased  $G_s$  or increased  $G_i$ ) and/or isoforms of adenylyl cyclases which also may be a result of one of the above events, particularly of PKA or PKC activation.

A role for  $\beta$ ARK in cardiac  $\beta$ -adrenoceptor desensitization in heart failure has recently been suggested by Ungerer et al. [128, 129]. They demonstrated that  $\beta$ ARK mRNA levels and activity are increased in hearts of patients with end-stage dilated or ischemic cardiomyopathy. Interestingly this did not involve altered amounts of  $\beta$ -arrestin at the mRNA or protein level [129]. Increased  $\beta$ ARK activity might be more important for  $\beta_2$ - than for  $\beta_1$ -adrenoceptor desensitization since it has been shown in various cell line experiments that the  $\beta_2$ -adrenoceptor undergoes more extensive phosphorylation by  $\beta$ ARK than the  $\beta_1$ -adrenoceptor, possibly because the  $\beta_2$ -adrenoceptor contains more potential  $\beta$ ARK phosphorylation sites than the  $\beta_1$ -adrenoceptor [130]. Some authors have even doubted that  $\beta$ ARK plays a physiological role at all in  $\beta_1$ -adrenoceptor phosphorylation [131].

PKA is also likely to contribute to  $\beta$ -adrenoceptor desensitization in chronic heart failure, since PKA will be chronically activated by enhanced endogenous noradrenaline in this setting. Böhm et al. [132] recently reported that the potency and efficacy of cyclic AMP in activating PKA is not changed in the failing human heart, indicating that PKA itself may not be altered, but this conclusion awaits confirmation by direct assessment of cardiac PKA activities. While PKA can clearly phosphorylate and desensitize  $\beta_1$ -adrenoceptors (e.g., in the human neuroblastoma cell line SK-N-MC [131]),  $\beta_2$ -adrenoceptors are much more susceptible to PKA-phosphorylation than  $\beta_1$ -adrenoceptors possibly because  $\beta_2$ -adrenoceptors contain two potential PKA-phosphorylation sites, but  $\beta_1$ -adrenoceptors contain only one [130].

Internalization seems not to play an important role in chronic heart failure since several groups have shown no differences in the percentage of  $\beta$ -adrenoceptors in a light vesicular fraction of non-failing and failing human hearts [133–135].

Down-regulation of  $\beta_1$ -adrenoceptor number has been demonstrated in all forms of chronic heart failure in man (see above). This down-regulation of  $\beta_1$ -adrenoceptors could be due to the decrease in mRNA levels that have been recently demonstrated in the hearts of patients with

dilated and ischemic cardiomyopathy [128,136]. mRNA levels for  $\beta_2$ -adrenoceptors were not altered in the failing human heart in these studies, but whether  $\beta_2$ -adrenoceptors are down-regulated at the protein level is still controversial (see above).

Despite these data many questions remain open to clarify the mechanism underlying  $\beta_1$ -adrenoceptor down-regulation and desensitization and  $\beta_2$ -adrenoceptor desensitization in chronic heart failure. For example, it is not known what mechanism triggers the decrease in  $\beta_1$ -adrenoceptor mRNA and why this process is selective for  $\beta_1$ -adrenoceptors (relative to  $\beta_2$ -adrenoceptors). This question is especially intriguing since they do not fit well into the general concepts of  $\beta_1$ - and  $\beta_2$ -adrenoceptor desensitization. Thus, it has been hypothesized that cardiac-derived noradrenaline is responsible for  $\beta_1$ -adrenoceptor down-regulation in chronic heart failure [137] because noradrenaline is a selective  $\beta_1$ -adrenoceptor agonist [138] and locally sympathetic drive is markedly enhanced in the heart [139]. This could lead to a selective down-regulation of  $\beta_1$ -adrenoceptors. Selective  $\beta_1$ -adrenoceptor down-regulation has been demonstrated in several tissues including the heart of rats harboring a noradrenaline-secreting pheochromocytoma [140,141]. On the other hand, it has been observed in various *in vivo* animal studies that following chronic  $\beta$ -adrenoceptor stimulation the cardiac  $\beta_2$ -adrenoceptor undergoes rapid desensitization and down-regulation while  $\beta_1$ -adrenoceptors were relatively resistant to down-regulation. This holds true not only for isoprenaline [142–146] and adrenaline [147], which are

non-selective  $\beta_1$ - and  $\beta_2$ -adrenoceptor agonists, but also for noradrenaline [147] which is a rather selective  $\beta_1$ -adrenoceptor agonist [138]. This differential susceptibility to desensitization is also found in isoprenaline-treated rats and guinea-pigs in which sympathetic nerve endings had been destroyed by 6-hydroxydopamine pretreatment [146,148]. Thus, chronic exposure of  $\beta_1$ - but not  $\beta_2$ -adrenoceptors to continuously released endogenous noradrenaline from sympathetic nerve endings cannot explain the differential regulation of the two subtypes. Recently, similar differences in  $\beta_1$ - and  $\beta_2$ -adrenoceptor desensitization have been also observed in human coronary arteries containing both  $\beta$ -adrenoceptor subtypes [149]. In this preparation a 16-hour *in vitro* incubation with noradrenaline did not affect  $\beta_1$ -adrenoceptor-mediated relaxation, but markedly desensitized  $\beta_2$ -adrenoceptor relaxation [150]. Thus,  $\beta$ -adrenoceptor regulation in the human heart with consistent  $\beta_1$ -adrenoceptor down-regulation but inconsistent  $\beta_2$ -adrenoceptor down-regulation appears to be quite unique and it is still not known why only  $\beta_1$ -adrenoceptors are so dramatically down-regulated in chronic heart failure.

Desensitization of cardiac  $\beta$ -adrenoceptor responses in human heart failure can also occur by altered G-protein expression. There is general agreement that  $\alpha$ -subunits of cardiac  $G_s$  are not quantitatively altered in chronic heart failure, either when determined on the protein level by cholera-toxin (CTX)-catalyzed ADP-ribosylation or quantitative Western-blotting, or on the mRNA levels (Table 1) or functionally in a reconstitution assay using *cyc*<sup>-</sup> cells

Table 1  
Changes in human cardiac G-proteins in chronic heart failure

| Diagnosis | Region                | Technique                     | Result                    | Reference |                               |
|-----------|-----------------------|-------------------------------|---------------------------|-----------|-------------------------------|
| DCM       | LV                    | PTX                           | $G_{1\alpha}/G_{0\alpha}$ | ↑36%      | Feldman et al. 1988 [151]     |
|           | LV                    | CTX + <i>cyc</i> <sup>-</sup> | $G_{s\alpha}$             | –         |                               |
| DCM       | RV                    | PTX                           | $G_{1\alpha}/G_{0\alpha}$ | ↑40%      | Neumann et al. 1988 [152]     |
| DCM       | LV                    | PTX                           | $G_{1\alpha}/G_{0\alpha}$ | ↑37%      | Böhm et al. 1990 [65]         |
| ICM       |                       |                               | $G_{1\alpha}/G_{0\alpha}$ | –         |                               |
| DCM       | LV                    | CTX                           | $G_{s\alpha}$             | –         | Schnabel et al. 1990 [214]    |
| DCM       | LV                    | Western                       | $G_{\alpha-37}$ kDa       | –         | Feldman et al. 1991 [153]     |
|           |                       |                               | $G_{\alpha-38}$ kDa       | –         |                               |
|           |                       |                               | $G_{\alpha-42}$ kDa       | –         |                               |
|           |                       |                               | $G_{1\alpha}/G_{0\alpha}$ | ↑         |                               |
| DCM       | LV                    | PTX                           | $G_{1\alpha}/G_{0\alpha}$ | ↑26%      | Hershberger et al. 1991 [66]  |
| DCM       | LV                    | PTX                           | $G_{1\alpha}/G_{0\alpha}$ | ↑103%     | Bristow et al. 1991 [154]     |
| ICM       | LV                    | PTX                           | $G_{1\alpha}/G_{0\alpha}$ | ↑91%      |                               |
| DCM/ICM   | LV                    | CTX                           | $G_{s\alpha}$             | –         |                               |
| DCM       | LV                    | RIA                           | $G_{1\alpha}$             | ↑138%     | Böhm et al. 1994 [158]        |
| ICM       | LV                    | RIA                           | $G_{1\alpha}$             | ↑58%      |                               |
| DCM/ICM   | RV                    | RIA                           | $G_{1\alpha}$             | –         |                               |
| DCM       | LV                    | Northern                      | $G_{1\alpha-3}$ -mRNA     | ↑92%      | Feldman et al. 1989 [155]     |
|           |                       |                               | $G_{0\alpha}$ -mRNA       | ↑36%      |                               |
|           |                       |                               | $G_{s\alpha}$ -mRNA       | ↑63%      |                               |
|           |                       |                               | $G_{1\alpha-2}$ -mRNA     | –         |                               |
| DCM       | LV                    | PCR                           | $G_{1\alpha-3}$ -mRNA     | –         | Feldman et al. 1991 [156]     |
|           |                       |                               | $G_{s\alpha}$ -mRNA       | –         |                               |
| DCM       | LV                    | Northern                      | $G_{1\alpha-2}$ -mRNA     | ↑103%     | Eschenhagen et al. 1992 [157] |
| ICM       | $G_{1\alpha-2}$ -mRNA |                               | ↑77%                      |           |                               |
| DCM/ICM   |                       |                               | $G_{1\alpha-3}$ -mRNA     | –         |                               |
| DCM/ICM   |                       |                               | $G_{s\alpha}$ -mRNA       | –         |                               |

Only studies comparing G-protein expression in failing human hearts as compared to non-failing control hearts are listed. Values represent percent changes from non-failing hearts. ↑ = increase, – no significant change. DCM = idiopathic dilated cardiomyopathy; ICM = ischemic cardiomyopathy; LV/RV = left/right ventricle; *cyc*<sup>-</sup> = assessment of  $G_{s\alpha}$  activity by reconstitution in *cyc*<sup>-</sup> membranes. PTX/CTX = pertussis or cholera, respectively, toxin-catalyzed ADP-ribosylation; RIA = radioimmunoassay; PCR = polymerase chain reaction. Modified from Eschenhagen [63] with permission.

[151]. On the other hand, the majority of studies have found cardiac expression of  $\alpha$ -subunits of  $G_i$  to be increased (Table 1). This has been initially demonstrated by pertussis-toxin-catalyzed ADP-ribosylation [65,66,151–154] which measures all forms of  $G_i$  as well as of  $G_o$ . However, the use of quantitative Western and Northern blotting to differentially assess expression of  $G_i$  isoforms at the protein and mRNA levels, respectively, has yielded controversial results with regard to the three  $G_{i\alpha}$  isoforms in end-stage dilated and ischemic cardiomyopathy. Thus, Feldman et al. [153,155,156] found  $G_{i\alpha-3}$  to be the predominant form in human heart which was unchanged in heart failure at the protein and mRNA level as determined by quantitative Western and Northern blotting; functionally decreased Gpp(NH)p- but not NaF-induced adenylyl cyclase activation, however, indicated some form of G-protein alteration. On the other hand, two other groups showed  $G_{i\alpha-2}$  to be the predominant form in human heart and this was found to be increased at both protein and mRNA levels [157,158]. Thus, it appears at present that cardiac PTX-substrates are increased in human heart failure, which may be related to a selectively enhanced expression of  $G_{i\alpha-2}$ .

Increased  $G_i$  expression could mitigate cyclic AMP formation, and thus contribute to the diminished response of  $\beta_2$ - or  $\beta_1$ -adrenoceptors in chronic heart failure. Three lines of evidence favor this hypothesis. First, in ventricular membranes obtained from end-stage heart failure, activation of adenylyl cyclase by GTP or its non-hydrolyzable analogue Gpp(NH)p (involving  $G_s$  and  $G_i$ ) and forskolin is diminished, while that induced by NaF (involving only  $G_s$ ) and  $Mn^{2+}$  (activating directly the catalytic unit of the adenylyl cyclase) are unchanged [for references, see Ref. 12]. Second, Feldman et al. [151] showed that pretreatment of cardiac membranes from severely failing hearts with PTX restores the previously decreased adenylyl cyclase response to isoprenaline, and third Brown and Harding (159) have recently shown, in isolated human cardiomyocytes, that pretreatment of PTX restored the previously reduced maximal inotropic response to isoprenaline. Moreover, PTX pretreatment also enhanced cyclic AMP responses in lymphocytes from heart failure patients but not in those from control subjects [160].

The mechanisms underlying the increase in  $G_i$  are not fully understood, but it has been speculated that it is due to the increased activity of the sympathetic nervous system and hence increased noradrenaline levels. This hypothesis is based on findings that chronic exposure of noradrenaline increases  $G_i$  in guinea-pig cardiomyocytes [159] and in rat neonatal cardiomyocytes [161] and chronic treatment of rats with isoprenaline increased myocardial  $G_i$  protein [162] and  $G_{i\alpha-2}$  and  $G_{i\alpha-3}$  mRNA [163,164]. Thus, it might well be that noradrenaline via increasing cyclic AMP and activating a cyclic AMP-response element in a  $G_i$ -gene might increase expression in chronic heart failure. Since the gene for  $G_{i\alpha-2}$  contains a possible consensus sequence of cyclic AMP-response element [165,166] while the  $G_{s\alpha}$ -gene does not contain a cyclic AMP response element [167], this would also explain why in chronic heart failure  $G_i$ , but not  $G_s$ , increases. However, similarly to  $\beta$ -adrenoceptor regulation in the human heart (see above) some

open questions still exist for  $G_i$ -regulation in chronic heart failure. If the cyclic AMP/cyclic AMP response element hypothesis is correct, one could expect that following chronic activation of  $\beta$ -adrenoceptors  $G_i$  increases in all cell types. We have recently tested this hypothesis in three different settings. First, we assessed  $\beta$ -adrenoceptor number and  $G_i$ -expression in myometria from pregnant women undergoing long-term  $\beta_2$ -adrenergic therapy to prevent pre-term labor. This treatment led to a marked decrease in  $\beta_2$ -adrenoceptor number but  $G_i$ -levels were unchanged, independently of whether assessed by PTX or quantitative Western blotting [168]. Secondly, we treated healthy volunteers for 2 weeks with the  $\beta_2$ -adrenergic agonist terbutaline and assessed  $\beta_2$ -adrenoceptor number and  $G_i$ -levels in circulating lymphocytes. Again, treatment caused a significant decrease in  $\beta_2$ -adrenoceptor number while  $G_i$ —assessed by PTX—was unchanged [169]. Thirdly, we have treated the human neuroblastoma cell line SK-N-MC containing a homogeneous population of  $\beta_1$ -adrenoceptors for 24 hours with 10  $\mu$ M isoprenaline; under these conditions  $\beta_1$ -adrenoceptors were down-regulated and the adenylyl cyclase response to isoprenaline was markedly desensitized, but again  $G_i$  was not changed [170]. Extending the incubation to 4 days also did not lead to any changes in  $G_i$  [Michel and Brodde, unpublished observations]. Thus, it appears that chronic activation of  $\beta$ -adrenoceptors is not the sole explanation for the increase in  $G_i$  in chronic heart failure, or at least that the underlying mechanism is not operative in all cell types and that possibly other factors may be involved as well. In this context it is interesting to note that in isolated rat neonatal cardiomyocyte tumor necrosis factor (TNF $\alpha$ ) can increase  $G_i$  [171]—and circulating levels of TNF $\alpha$  have recently been found to be markedly elevated in patients with severe chronic heart failure [172]. However, it might also be possible that the increases in human cardiac  $G_i$  observed in chronic heart failure are more an organ (cardiac)-specific than a general phenomenon, as the pronounced  $\beta_1$ -adrenoceptor down-regulation in chronic human heart failure is also somewhat atypical.

Relatively little is known about changes in cardiac adenylyl cyclase in chronic human heart failure. In the majority of studies  $Mn^{2+}$  has been used to assess the activity of the catalytic unit of the enzyme; nearly all studies have shown unchanged activity in different forms of heart failure [for review, see Ref. 12], with the exception of a decreased activity of the catalytic unit in right ventricular preparations from hearts subjected to pressure overload [173]. However, at least eight isoforms of membrane-bound adenylyl cyclase have been cloned [174,175]; among these the heart, including human heart, seems to contain mainly type V and VI adenylyl cyclase, i.e. those isoforms that are inhibited by  $G_i$  and submicromolar  $Ca^{2+}$  concentrations in a calmodulin-independent manner [176]. It has been recently shown that in dogs rapid-pacing-induced heart failure caused a reduction in steady-state mRNA-levels of type V and VI adenylyl cyclase [177]; moreover, in rats, steady-state mRNA levels of type V and VI adenylyl cyclase showed age-dependent changes but in an opposite direction: while type V increased with age, type VI decreased with age and this decrease paralleled the



decrease in adenylyl cyclase activity [178]. Thus, the possibility might be considered that cardiac adenylyl cyclase activity is—at least partly—determined by the ratio of the isoforms of the enzyme. However, at present nothing is known on possible adenylyl cyclase isoform switches in the failing human heart.

Only a few data exist on changes of the other  $G_s$ -coupled cardiac receptors in chronic human heart failure. VIP-receptor number and the contractile response of left ventricles of severely failing hearts were found to be markedly reduced [54] while interestingly affinity of the receptors to VIP was enhanced. Nothing is known on changes of cardiac 5-HT<sub>4</sub>-receptors in chronic heart failure. Controversial data have been reported on H<sub>2</sub>-receptor changes in chronic heart failure. One study described unchanged receptor number in left ventricular membranes from patients with mild to moderate heart failure because of mitral and aortic valve disease [49]; in this study the positive inotropic effect of the H<sub>2</sub>-receptor agonist impromidine was unchanged while that of isoprenaline was markedly reduced. Similarly, Bristow et al. [48] found an unchanged histamine-induced positive inotropic effect in left ventricles from patients with severe heart failure compared with the effects on ventricles from non-failing hearts. On the other hand, Näbauer et al. [56] found the positive inotropic effect of histamine markedly reduced in severely failing hearts. However, all receptor systems involving the  $G_s$ -adenylyl cyclase pathway (and hence cyclic AMP as one of the most important second messengers) in the human heart appear to have a low spare receptor capacity for positive inotropic effects (see above), and therefore any decrease in receptor number and/or any impairment in coupling receptor to the adenylyl cyclase/cyclic AMP system should reduce their positive inotropic effects. As discussed above, in chronic heart failure the functional activity of  $G_i$  is increased, which leads to inhibition of cyclic AMP formation. Therefore, it might be expected that all cyclic AMP-dependent positive inotropic responses are reduced under these conditions, as this has been clearly shown for  $\beta$ -adrenergic agonists and cyclic AMP-dependent phosphodiesterase inhibitors [179; for further references, see Ref. 12]. Certainly additional experiments are needed to clarify this point.

In this context it is interesting to note that the ageing human heart shows some similarities to the failing human heart: it is well known that the ageing human heart has reduced responses to  $\beta$ -adrenergic stimulation [for references, see Refs. 180 and 181]. Two groups have recently studied the mechanisms underlying this effect in more detail. We determined in right atria from 52 patients undergoing open-heart surgery without apparent heart failure of different ages (7 days–83 years)  $\beta$ -adrenoceptor number and subtype distribution,  $G_s$ - and  $G_i$ -proteins and adenylyl cyclase activity [182]. We found significant negative correlations between GTP-, isoprenaline-, histamine-, 5-HT-, forskolin-, NaF- and Mn<sup>2+</sup>-activated adenylyl cyclase and the age of the patients. In addition,  $G_{i\alpha}$  increased with age;  $\beta$ -adrenoceptor number and subtype distribution, however, were unchanged. These results indicate that in the human right atrium the reduction in  $\beta$ -adrenergic responsiveness with age might involve a reduction in the

activity of the catalytic unit of the adenylyl cyclase, which leads to impairment of cyclic AMP formation. An increase in  $G_i$  might enhance that effect. White et al. [183] studied the  $\beta$ -adrenoceptor-G-protein-adenylyl cyclase system in ventricular myocardium obtained from potential organ donors whose heart could not be used for transplantation for several reasons. They found—similarly to the right atrium—an age-dependent decline in adenylyl cyclase activity in response to isoprenaline, Gpp(NH)p, NaF and forskolin but not to Mn<sup>2+</sup>. In addition, in contrast to the right atrium, in aged ventricular myocardium  $G_{s\alpha}$  was decreased, whereas  $G_{i\alpha}$  was unchanged;  $\beta$ -adrenoceptor number decreased with age and this was due to a selective decrease in  $\beta_1$ -adrenoceptors. Although the reason for these (chamber-specific?) differences between aged right atria and aged ventricular myocardium is not known at present, these data clearly indicate that in both settings—chronic heart failure and advanced age— $\beta$ -adrenoceptor-mediated effects and all other cyclic-AMP-dependent effects are depressed.

### 3.2. $G_i$ -coupled receptors

Much less is known at present about  $G_i$ -coupled cardiac receptors and cardiac receptor signalling through the phospholipase C pathway in chronic heart failure. The number of adenosine A<sub>1</sub>- [65] and muscarinic M<sub>2</sub>-receptors [65,67,184] is unchanged like the negative inotropic effect of adenosine and carbachol which surprisingly is not changed in patients with severe heart failure [65–67] despite the increase in  $G_i$  (see above). These findings indicate (a) that either the  $G_i$ -pathway might be not the most important signalling pathway for these receptors or (b) considering the receptor/G-protein ratio of 1:10 to 1:100 [185] that the small increases in  $G_i$  seen in chronic heart failure (about 30–50%) may not significantly contribute to the extent of the functional responses.

### 3.3. Receptor systems signalling independent of the cyclic AMP system

The human cardiac  $\alpha_1$ -adrenoceptor is the most intensively studied among the phospholipase-C-coupled receptors in chronic heart failure. There appears to be general agreement that the number of  $\alpha_1$ -adrenoceptors (although very low in the human heart) is increased in patients with chronic heart failure [92,116,186]; the mechanism underlying this phenomenon is not completely understood but may be due to the fact that it has been shown in a cell line that chronic  $\beta$ -adrenergic stimulation increases the amount of  $\alpha_1$ -adrenoceptor mRNA [187]. On the other hand, in rats chronically treated with the  $\beta$ -adrenoceptor antagonist propranolol,  $\alpha_1$ -adrenoceptors also increase [188,189], which might argue against the cross-regulation hypothesis. Despite the increased number,  $\alpha_1$ -adrenoceptor-mediated inositol phosphate accumulation is unchanged in the failing human heart [85,116]. Controversial data exist on the positive inotropic effect induced by  $\alpha_1$ -adrenoceptor activation. While Böhm et al. [86] found it to be unchanged in left ventricular preparations from patients with severe



chronic heart failure, Steinfath et al. [92] demonstrated in this preparation a marked decreased response to phenylephrine and noradrenaline; these *in vitro* data have been recently confirmed in an *in vivo* study by Landzberg et al. [83] who demonstrated that the positive inotropic effect of phenylephrine was markedly reduced in patients with severe heart failure when compared with healthy controls following intracoronary injections. Thus, taken together, the increased number, the unchanged inositol phosphate response and the (presumably) decreased inotropic response indicate that cardiac  $\alpha_1$ -adrenoceptors in chronic heart failure are uncoupled from the response.

Similar to  $\alpha_1$ -adrenoceptors,  $M_2$ -receptor [116] and  $ET_A$ -receptor [Brodde, unpublished observations] induced inositol phosphate accumulation seems not to be different in failing and non-failing human hearts. Preliminary data suggest that the endothelin-induced positive inotropic effect in left ventricular preparations of severely failing human hearts is decreased [107,190]. However, this remains to be confirmed in other studies.

Finally, controversial data have been published on changes in AT-receptor number in the failing human heart. Urata et al. [191] described AT-receptors to be unchanged while Regitz-Zagrosek et al. [102] recently found in atria and ventricular myocardium obtained from explanted hearts of patients with end-stage heart failure markedly decreased AT-receptors assessed on both a protein and a mRNA-level. Whether positive inotropic responses to angiotensin II in heart failure are changed is not known at present.

#### 4. Animal models of chronic heart failure

As discussed above, a general feature of human heart failure seems to be a decrease in cardiac  $\beta$ -adrenoceptors accompanied by increases in the functional activity of cardiac  $G_i$  resulting in a marked attenuation of adenylyl cyclase activation. To investigate the mechanisms underlying these alterations in more detail, numerous studies have been performed in animal models of heart failure, but the

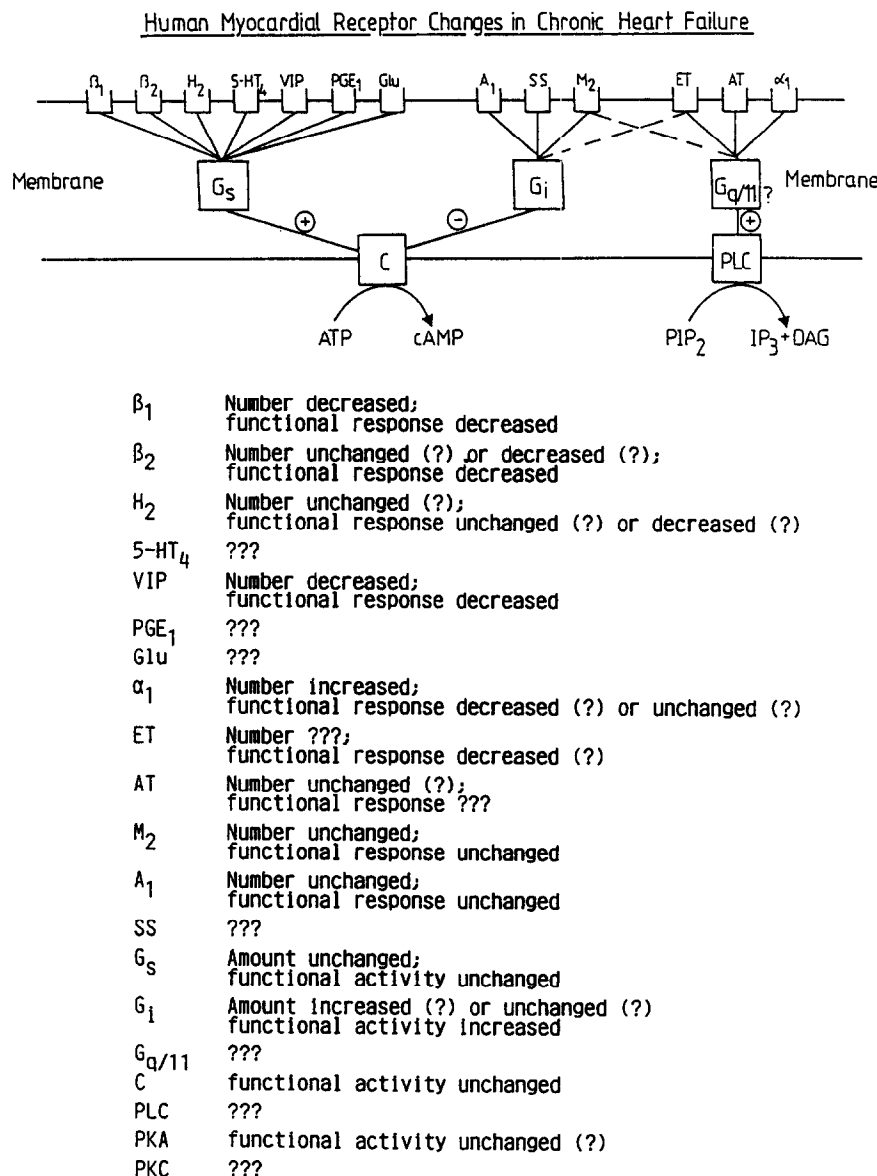

Fig. 2. Changes in human cardiac receptor systems and their signal-transduction mechanisms in chronic heart failure. For details, see text. For explanation of abbreviations, see legend to Fig. 1. PKA = protein kinase A; PKC = protein kinase C.

results were quite different from those obtained in human heart failure. Thus, a decreased  $\beta$ -adrenoceptor density (mainly  $\beta_1$ -adrenoceptors) has been found in dogs with right heart failure produced by progressive pulmonary artery constriction and tricuspid avulsion [192], in dogs [193,194] and pigs [195,196] with congestive heart failure due to rapid pacing, in pigs with chronic volume-overload hypertrophy and circulatory congestion [197], and in rabbits with chronic heart failure due to pressure and volume overload [198]. On the other hand,  $\beta$ -adrenoceptor density was found to be unchanged in rats [199] and dogs [200] with heart failure due to myocardial infarction as well as in the genetically-linked model of cardiomyopathy, the Syrian hamster [201,202]; and finally, increased  $\beta$ -adrenoceptor density was found in guinea-pigs [203] and dogs [204,205] with heart failure due to pressure overload. However, in all these models adenylyl cyclase activation by GTP, isoprenaline and forskolin was attenuated, indicating that disturbances in coupling  $\beta$ -adrenoceptors to the adenylyl cyclase also occur in animal models of heart failure.

Several studies have addressed the question of whether cardiac G-proteins might be changed in animal models of heart failure. Again, the data obtained were quite different from those obtained in human heart failure. Thus, while it is generally agreed that  $G_{s\alpha}$  is not changed in human heart failure, in the animal models of heart failure in the majority of studies a decrease in either the amount (assessed by CTX-catalyzed ADP-ribosylation or Western blotting) or function (assessed by the  $cyc^-$  reconstitution assay) or mRNA-levels for  $G_{s\alpha}$  was found in the pressure overload model of the dog [206], in the volume-overload model of the pig [197], in the rapid pacing model of the pig [195,196] and in the genetic model of cardiomyopathy, the Syrian hamster [201,207], although Sehti et al. [202] recently found increased amounts of  $G_{s\alpha}$  in this model. Furthermore, in contrast to human heart failure  $G_{i\alpha}$  (assessed by PTX-catalyzed ADP-ribosylation or Western-blotting) and mRNA levels for  $G_{i\alpha}$  were in general not found to be increased (with the exception of a recent study by Sehti et al. [202] in the Syrian hamster) but were either unchanged (in the pressure overload model of the dog [208], in the volume-overload model of the pig [197], and in the Syrian hamster [201]) or decreased (in the rapid pacing model of the pig [195,196] and in the Syrian hamster [207]) in the animal models of heart failure. Taken together, these results show that at present it is quite difficult to extrapolate from results obtained in animal models of chronic heart failure to human heart failure.

## 5. Conclusion

In the human heart many receptor systems exist that regulate contractility and heart rate. Among these the  $\beta$ -adrenoceptor– $G_s$ -protein–adenylyl cyclase system is the most powerful physiologic mechanism to acutely augment cardiac contractility (cf. Fig. 1). In chronic heart failure this pathway exhibits two marked alterations: (a) a decrease in  $\beta_1$ -adrenoceptor number and (b) an increase in the functional activity of  $G_i$ . Both will lead to reduced

physiologic responses of the failing human heart to  $\beta$ -adrenergic stimulation. In addition, the increase in  $G_i$ —which reduces cyclic AMP formation—might also cause diminished physiologic responses of the failing human heart to activation of all receptor systems signalling through the  $G_s$ -adenylyl cyclase/cyclic AMP pathway (cf. Fig. 2). Interestingly, the functional activity of receptor systems signalling via  $G_i$  is unchanged in chronic heart failure despite the increase in  $G_i$  (cf., Fig. 2). On the other hand, very little information is available on changes in receptor systems signalling through the PLC/IP<sub>3</sub>/DAG pathway in the human heart although some preliminary data might suggest that these receptor systems are also desensitized from their functional response.

Thus, although during the last decade much has been learned about alterations in cardiac signal transduction mechanisms in chronic heart failure, many open questions remain, for example: (i) Why is it predominantly the  $\beta_1$ -adrenoceptor that is down-regulated in chronic heart failure? (ii) What is the mechanism underlying the increase in (the functional activity of)  $G_i$ ? (iii) What is the physiologic role of PLC/IP<sub>3</sub>/DAG-coupled receptors in the human heart and how are the components of this system altered in chronic heart failure? (iv) Since cross-talk between different signalling pathways has been demonstrated in many cell culture systems [209], how does cross-talk between the different signalling pathways in the human heart (cf. Figs. 1 and 2) contribute to alterations in signal-transduction mechanisms observed in chronic heart failure? Cross-talk between  $\beta_1$ -adrenergic,  $\beta_2$ -adrenergic and M<sub>2</sub>-muscarinic receptors may in fact exist in the human heart: in patients with coronary artery disease chronic treatment with selective  $\beta_1$ -adrenoceptor antagonists such as metoprolol, bisoprolol and atenolol caused selective up-regulation of right atrial  $\beta_1$ -adrenoceptor number and down-regulation of muscarinic M<sub>2</sub>-receptor number; right atrial  $\beta_2$ -adrenoceptor number was unaltered [210,211]. On the other hand, inotropic responses to noradrenaline (acting solely via  $\beta_1$ -adrenoceptors, see above) were unchanged while  $\beta_2$ -adrenoceptor-mediated positive inotropic effects of procaterol and salbutamol were markedly enhanced [211,212]; similarly, in vivo in  $\beta_1$ -adrenoceptor-antagonist-treated patients the positive chronotropic effect of salbutamol was significantly increased [213].

## Acknowledgements

This work was partly supported by the Deutsche Forschungsgemeinschaft (DFG Br 526/3-1, 526/3-2 to O.E.B.; DFG Ze 218/3-1, 218/3-2 to H.R.Z., DFG Mi 294/5-1 to M.C.M.). The assistance of Mrs. Maria Eliesen in the preparation of the manuscript is sincerely appreciated.

## References

- [1] Trautwein W, Hescheler J. Regulation of cardiac L-type calcium current by phosphorylation and G proteins. *Annu Rev Physiol* 1990;52:257–274.

- [2] Walsh DA, Van Patten SM. Multiple pathway signal transduction by the cAMP-dependent protein kinase. *FASEB J* 1994;8:1227–1236.
- [3] Mattera R, Graziano MP, Yatani A, et al. Splice variants of the  $\alpha$ -subunit of the G protein  $G_{s\alpha}$  activate both adenylyl cyclase and calcium channels. *Science* 1988;243:804–807.
- [4] Matsuda JJ, Lee H, Shibata EF. Enhancement of rabbit cardiac sodium channels by  $\beta$ -adrenergic stimulation. *Circ Res* 1992;70:199–207.
- [5] Hartzell HC, Mery P-F, Fischmeister R, Szabo G. Sympathetic regulation of cardiac calcium current is exclusively to cAMP-dependent phosphorylation. *Nature* 1991;351:573–576.
- [6] Schubert B, VanDongen AMJ, Kirsch GE, Brown AM.  $\beta$ -Adrenergic inhibition of cardiac sodium channels by dual G-protein pathways. *Science* 1989;245:516–519.
- [7] Birnbaumer L, Abramowitz J, Brown AM. Receptor–effector coupling by G proteins. *Biochim Biophys Acta* 1990;1031:163–224.
- [8] Ferro A, Plumpton C, Brown MJ. Is receptor cross-regulation in human heart caused by alterations in cardiac guanine nucleotide-binding proteins? *Clin Sci* 1993;85:393–399.
- [9] Michel MC, Farke W, Erdbrügger W, Philipp T, Brodde O-E. Ontogenesis of sympathetic responsiveness in spontaneously hypertensive rats. II. Renal G proteins in male and female rats. *Hypertension* 1994;23:653–658.
- [10] Jones CR, Molenaar P, Summers RJ. New views of human cardiac  $\beta$ -adrenoceptors. *J Mol Cell Cardiol* 1989;21:519–535.
- [11] Bristow MR, Hershberger RE, Port JD, et al.  $\beta$ -Adrenergic pathways in nonfailing and failing human ventricular myocardium. *Circulation* 1990;82(suppl 1):I-12–I-25.
- [12] Brodde O-E.  $\beta_1$ - and  $\beta_2$ -adrenoceptors in the human heart: properties, function, and alterations in chronic heart failure. *Pharmacol Rev* 1991;43:203–242.
- [13] Steinfath M, Lavicky J, Schmitz W, Scholz H, Döring V, Kalmar P. Regional distribution of  $\beta_1$ - and  $\beta_2$ -adrenoceptors in the failing and nonfailing human hearts. *Eur J Clin Pharmacol* 1992;42:607–612.
- [14] Elnatan J, Molenaar P, Rosenfeldt FL, Summers RJ. Autoradiographic localization and quantitation of  $\beta_1$ - and  $\beta_2$ -adrenoceptors in the human atrioventricular conducting system: a comparison of patients with idiopathic dilated cardiomyopathy and ischemic heart disease. *J Mol Cell Cardiol* 1994;26:313–323.
- [15] Kaumann AJ. Is there a third heart  $\beta$ -adrenoceptor? *Trends Pharmacol Sci* 1989;10:316–320.
- [16] Krief S, Lönnqvist F, Raimbault S, et al. Tissue distribution of  $\beta_3$ -adrenoceptor mRNA in man. *J Clin Invest* 1993;91:344–349.
- [17] Berkowitz DE, Nardone NA, Smiley RM, et al. Distribution of  $\beta_3$ -adrenoceptor mRNA in human tissues. *Eur J Pharmacol* 1995;289:223–228.
- [18] Brodde O-E, O'Hara N, Zerkowski H-R, Rohm N. Human cardiac  $\beta$ -adrenoceptors: both  $\beta_1$ - and  $\beta_2$ -adrenoceptors are functionally coupled to the adenylyl cyclase in right atrium. *J Cardiovasc Pharmacol* 1984;6:1184–1191.
- [19] Bristow MR, Hershberger RE, Port JD, Minobe W, Rasmussen R.  $\beta_1$ - and  $\beta_2$ -adrenoceptor-mediated adenylyl cyclase stimulation in nonfailing and failing human ventricular myocardium. *Mol Pharmacol* 1989;35:295–303.
- [20] Kaumann AJ, Hall JA, Murray KJ, Wells FC, Brown MJ. A comparison of the effects of adrenaline and noradrenaline on human heart: the role of  $\beta_1$ - and  $\beta_2$ -adrenoceptors in the stimulation of adenylyl cyclase and contractile force. *Eur Heart J* 1989;10(suppl B):29–37.
- [21] Ikezono K, Michel MC, Zerkowski H-R, Beckeringh JJ, Brodde O-E. The role of cyclic AMP in the positive inotropic effect mediated by  $\beta_1$ - and  $\beta_2$ -adrenoceptors in isolated human right atrium. *Naunyn-Schmiedeberg's Arch Pharmacol* 1987;335:561–566.
- [22] Green SA, Holt BD, Liggett SB.  $\beta_1$ - and  $\beta_2$ -adrenoceptors display subtype-selective coupling to  $G_s$ . *Mol Pharmacol* 1992;41:889–893.
- [23] Levy FO, Zhu X, Kaumann AJ, Birnbaumer L. Efficacy of  $\beta_1$ -adrenergic receptors is lower than that of  $\beta_2$ -adrenergic receptors. *Proc Natl Acad Sci* 1993;90:10798–10802.
- [24] Hayes JS, Brunton LL, Mayer SE. Selective activation of particulate cAMP-dependent protein kinase by isoproterenol and prostaglandin  $E_1$ . *J Biol Chem* 1980;255:5113–5119.
- [25] Buxton IL, Brunton LL. Compartments of cyclic AMP and protein kinase in mammalian cardiomyocytes. *J Biol Chem* 1983;258:10233–10239.
- [26] Aass H, Skomedal T, Osnes J-B. Increase of cyclic AMP in sub-cellular fractions of rat heart muscle after  $\beta$ -adrenergic stimulation: prenalterol and isoprenaline cause different distribution of bound cyclic AMP. *J Mol Cell Cardiol* 1988;20:847–860.
- [27] Hohl CM, Li Q. Compartmentation of cAMP in adult canine ventricular myocytes: relation to single-cell free  $Ca^{2+}$  transients. *Circ Res* 1991;69:1369–1379.
- [28] Feldman AM, Bristow MR. The  $\beta$ -adrenergic pathway in the failing human heart: implications for inotropic therapy. *Cardiology* 1990;77(suppl 1):1–32.
- [29] Del Monte F, Kaumann AJ, Poole-Wilson PA, Wynne DG, Pepper J, Harding SE. Coexistence of functioning  $\beta_1$ - and  $\beta_2$ -adrenoceptors in single myocytes from human ventricle. *Circulation* 1993;88:854–863.
- [30] Bristow MR. Myocardial cell surface membrane receptors in heart failure. *Heart Failure* 1989;5:47–50.
- [31] Motomura S, Zerkowski H-R, Daul A, Brodde O-E. On the physiologic role of beta-2 adrenoceptors in the human heart: in vitro and in vivo studies. *Am Heart J* 1990;119:608–619.
- [32] McDevitt DG. In vivo studies on the function of cardiac  $\beta$ -adrenoceptors in man. *Eur Heart J* 1989;10(suppl B):22–28.
- [33] Strauss MH, Reeves RA, Smith DL, Leenen FHH. The role of cardiac beta-1 receptors in the hemodynamic response to a beta-2 agonist. *Clin Pharmacol Ther* 1986;40:108–115.
- [34] Levine MAH, Leenen FHH. Role of  $\beta_1$ -receptors and vagal tone in cardiac inotropic and chronotropic responses to a  $\beta_2$ -agonist in humans. *Circulation* 1989;79:107–115.
- [35] Schäfers RF, Adler S, Daul A, et al. Positive inotropic effect of the beta-2-adrenoceptor agonist terbutaline in the human heart: effects of long-term beta-1-adrenoceptor antagonist treatment. *J Am Coll Cardiol* 1994;23:1224–1233.
- [36] Hall JA, Petch MC, Brown MJ. Intracoronary injections of salbutamol demonstrate the presence of functional  $\beta_2$ -adrenoceptors in the human heart. *Circ Res* 1989;65:546–553.
- [37] Johnsson G. Influence of metoprolol and propranolol on hemodynamic effects induced by adrenaline and physical work. *Acta Toxicol* 1975;36(suppl):59–68.
- [38] Leenen FHH, Chan YK, Smith DL, Reeves RA. Epinephrine and left ventricular function in humans: effects of beta-1 vs nonselective beta-blockade. *Clin Pharmacol Ther* 1988;43:519–528.
- [39] Daul A, Hermes U, Schäfers RF, Wenzel R, Von Birgelen C, Brodde O-E. The  $\beta$ -adrenoceptor subtype(s) mediating adrenaline- and dobutamine-induced blood pressure and heart rate changes in healthy volunteers. *Int J Clin Pharmacol Ther* 1995;33:140–148.
- [40] Brown MJ, Brown DC, Murphy MB. Hypokalemia from beta-2-receptor stimulation by circulating epinephrine. *N Engl J Med* 1983;309:1414–1419.
- [41] Milano CA, Allen LF, Rockman HA, et al. Enhanced myocardial function in transgenic mice overexpressing the  $\beta_2$ -adrenergic receptor. *Science* 1994;264:582–586.
- [42] Bertin B, Mansier P, Makeh I, et al. Specific atrial overexpression of G protein coupled human  $\beta_1$  adrenoceptors in transgenic mice. *Cardiovasc Res* 1993;27:1606–1612.
- [43] Schütz W, Freissmuth M. Reverse intrinsic activity of antagonists on G protein-coupled receptors. *Trends Pharmacol Sci* 1992;13:376–380.
- [44] Samama P, Pei G, Costa T, Cotecchia S, Lefkowitz RJ. Negative antagonists promote an inactive conformation of the  $\beta_2$ -adrenergic receptor. *Mol Pharmacol* 1994;45:390–394.
- [45] Chidiac P, Hebert TE, Valiquette M, Dennis M, Bouvier M. Inverse, agonist activity of  $\beta$ -adrenergic antagonists. *Mol Pharmacol* 1994;45:490–499.
- [46] Mewes T, Dutz S, Ravens U, Jakobs KH. Activation of calcium currents in cardiac myocytes by empty  $\beta$ -adrenoceptors. *Circ Res* 1993;88:2916–2922.

- [47] Milligan G, Bond RA, Lee M. Inverse agonism: pharmacological curiosity or potential therapeutic strategy? *Trends Pharmacol Sci* 1995;16:10–13.
- [48] Bristow MR, Cubicciotti R, Ginsburg R, Stinson EB, Johnson C. Histamine-mediated adenylate cyclase stimulation in human myocardium. *Mol Pharmacol* 1982;21:671–679.
- [49] Baumann G, Mercader D, Busch U, et al. Effects of the H<sub>2</sub>-receptor agonist impromidine in human myocardium from patients with heart failure due to mitral and aortic valve disease. *J Cardiovasc Pharmacol* 1983;5:618–625.
- [50] Zerkowski H-R, Broede A, Kunde K, et al. Comparison of the positive inotropic effects of serotonin, histamine, angiotensin II, endothelin and isoprenaline in the isolated human right atrium. *Naunyn-Schmiedeberg's Arch Pharmacol* 1993;347:347–352.
- [51] Kaumann AJ, Sanders L, Brown AM, Murray KJ, Brown MJ. A 5-hydroxytryptamine receptor in human atrium. *Br J Pharmacol* 1990;100:879–885.
- [52] Kaumann AJ, Sanders L, Brown AM, Murray KJ, Brown MJ. A 5-HT<sub>4</sub>-like receptor in human right atrium. *Naunyn-Schmiedeberg's Arch Pharmacol* 1991;344:150–159.
- [53] Sanders L, Kaumann AJ. A 5-HT<sub>4</sub>-like receptor in human left atrium. *Naunyn-Schmiedeberg's Arch Pharmacol* 1992;345:382–386.
- [54] Hershberger RE, Anderson FL, Bristow MR. Vasoactive intestinal peptide receptor in failing human ventricular myocardium exhibits increased affinity and decreased density. *Circ Res* 1989;65:283–294.
- [55] Ginsburg R, Bristow MR, Stinson EB, Harrison DC. Histamine receptors in the human heart. *Life Sci* 1980;26:2245–2249.
- [56] Nábauer M, Böhm M, Brown L, et al. Positive inotropic effects in isolated ventricular myocardium from non-failing and terminally failing human hearts. *Eur J Clin Invest* 1988;18:600–606.
- [57] Schoemaker RG, Du XY, Bax WA, Bos E, Saxena PR. 5-Hydroxy-tryptamine stimulates human isolated atrium but not ventricle. *Eur J Pharmacol* 1993;230:113–115.
- [58] Jahnel U, Rupp J, Ertl R, Nawrath H. Positive inotropic response to 5-HT in human atrial but not in ventricular heart muscle. *Naunyn-Schmiedeberg's Arch Pharmacol* 1992;346:482–486.
- [59] Kaumann AJ, Lemoine H, Morris TH, Schwederski U. An initial characterization of human heart  $\beta$ -adrenoceptors and their mediation of the positive inotropic effects of catecholamines. *Naunyn-Schmiedeberg's Arch Pharmacol* 1982;319:216–221.
- [60] Bristow MR, Ginsburg R, Minobe W, et al. Decreased catecholamine sensitivity and  $\beta$ -adrenergic-receptor density in failing human hearts. *N Engl J Med* 1982;307:205–211.
- [61] Schwinger RHG, Böhm M, Erdmann E. Evidence against spare or uncoupled  $\beta$ -adrenoceptors in the human heart. *Am Heart J* 1990;119:899–904.
- [62] Brown L, Deighton NM, Bals S, et al. Spare receptors for  $\beta$ -adrenoceptor-mediated positive inotropic effects of catecholamines in the human heart. *J Cardiovasc Pharmacol* 1992;19:222–232.
- [63] Eschenhagen T. G Proteins and the heart. *Cell Biol Int* 1993;17:723–749.
- [64] Delhay J-P, De Smet JM, Taton G, et al. A comparison between muscarinic receptor occupancy, adenylate cyclase inhibition, and inotropic responses in human heart. *Naunyn-Schmiedeberg's Arch Pharmacol* 1984;325:170–175.
- [65] Böhm M, Gierschik P, Jakobs K-H, et al. Increase of G<sub>i $\alpha$</sub>  in human hearts with dilated but not ischemic cardiomyopathy. *Circulation* 1990;82:1249–1265.
- [66] Hershberger RE, Feldman AM, Bristow MR. A<sub>1</sub>-Adenosine receptor inhibition of adenylate cyclase in failing and nonfailing human ventricular myocardium. *Circulation* 1991;83:1343–1351.
- [67] Deighton NM, Zerkowski H-R, Brodde O-E. Muscarinic receptor number and functional responsiveness in patients with mild-to-moderate and end-stage heart failure. *Eur Heart J* 1990;11(suppl):71(abstract).
- [68] Hershberger RE, Port JD, Anderson FL. Somatostatin inhibits adenylate cyclase activity in human ventricular myocardium. *Circulation* 1988;78(suppl II):II-560(abstract).
- [69] Löffelholz K, Pappano AJ. The parasympathetic neuroeffector junction of the heart. *Pharmacol Rev* 1985;37:1–24.
- [70] Yatani A, Mattera R, Codina J, et al. The G-protein-gated K<sup>+</sup> channel is stimulated by three distinct G<sub>i $\alpha$</sub> -subunits. *Nature* 1988;336:680–682.
- [71] Fleming JW, Wisler PL, Watanabe AM. Signal transduction by G proteins on cardiac tissues. *Circulation* 1992;85:420–433.
- [72] Schmitz W, Scholz H, Erdmann E. Effects of  $\alpha$ - and  $\beta$ -adrenergic agonists, phosphodiesterase inhibitors and adenosine on isolated human heart muscle preparations. *Trends Pharmacol Sci* 1987;8:447–450.
- [73] Jakob U, Oelert H, Rupp J, Nawrath H. Functional role of cholinergic and purinergic receptors in human isolated atrial and ventricular heart muscle. *Br J Pharmacol* 1989;97:1199–1208.
- [74] Böhm M, Pieske B, Ungerer M, Erdmann E. Characterization of A<sub>2</sub> adenosine receptors in atrial and ventricular myocardium from diseased human hearts. *Circulation* 1989;65:1201–1211.
- [75] Deighton NM, Motomura S, Borquez D, Zerkowski H-R, Doetsch N, Brodde O-E. Muscarinic cholinergic receptors in the human heart: demonstration, subclassification, and distribution. *Naunyn-Schmiedeberg's Arch Pharmacol* 1990;341:14–21.
- [76] Du XY, Schoemaker RG, Bos E, Saxena PR. Different pharmacological responses of atrium and ventricle: studies with human cardiac tissue. *Eur J Pharmacol* 1994;259:173–180.
- [77] Giraldo E, Martos F, Gomez A, et al. Characterization of muscarinic receptor subtypes in human tissues. *Life Sci* 1988;43:1507–1515.
- [78] Wagner J, Brodde O-E. On the presence and distribution of  $\alpha$ -adrenoceptors in the heart of various mammalian species. *Naunyn-Schmiedeberg's Arch Pharmacol* 1979;302:239–254.
- [79] Scholz H. Effects of beta- and alpha-adrenoceptor activators and adrenergic transmitter releasing agents on the mechanical activity in the heart. In: L. Szekeres (Editor), *Handbook of Experimental Pharmacology*, Vol. 54/1: Adrenergic Activators and Inhibitors, Berlin: Springer-Verlag, 1980;651–733.
- [80] Endoh M. Adrenoceptors and the myocardial inotropic response: Do alpha and beta receptor sites functionally coexist? In: Kalsner S (ed) *Trends in autonomic pharmacology*, vol 2. Urban & Schwarzenberg, Baltimore Munich, 1982; pp 304–322.
- [81] Endoh M. Signal transduction of myocardial  $\alpha_1$ -adrenoceptors: regulation of ion channels, intracellular calcium, and force of contraction. *J Appl Cardiol* 1991;6:379–399.
- [82] Curiel R, Perez-Gonzalez J, Brito N, Zepa R, Tellez D, Cabrera J, Curiel C, Cubeddu L. Positive inotropic effects mediated by  $\alpha_1$  adrenoceptors in intact human subjects. *J Cardiovasc Pharmacol* 1989;14:603–615.
- [83] Landzberg JS, Parker JD, Gauthier DF, Colucci WS. Effects of myocardial  $\alpha_1$ -adrenoceptor stimulation and blockade on contractility in humans. *Circulation* 1991;84:1608–1614.
- [84] Steinfath M, Chen Y-L, Lavicky J, Magnussen O, Nose M, Ross-wag S, Schmitz W, Scholz H. Cardiac  $\alpha_1$ -adrenoceptor densities in different mammalian species. *Br J Pharmacol* 1992;107:185–188.
- [85] Bristow MR, Minobe W, Rasmussen R, Hershberger RE, Hoffman BB. Alpha-1 adrenoceptors in the nonfailing and failing human heart. *J Pharmacol Exp Ther* 1988;247:1039–1045.
- [86] Böhm M, Diet F, Feiler G, Kemkes B, Erdmann E.  $\alpha$ -Adrenoceptors and  $\alpha$ -adrenoceptor-mediated positive inotropic effects in failing human myocardium. *J Cardiovasc Pharmacol* 1988;12:357–364.
- [87] Schümann HJ, Wagner J, Knorr A, Reidemeister JC, Sadony V, Schramm G. Demonstration in human atrial preparations of alpha-adrenoceptors mediating positive inotropic effects. *Naunyn Schmiedeberg's Arch Pharmacol* 1978;302:333–336.
- [88] Skomedal T, Aass H, Osnes J-B, et al. Demonstration of an alpha adrenoceptor-mediated inotropic effect of norepinephrine in human atria. *J Pharmacol Exp Ther* 1985;233:441–446.
- [89] Jahnel U, Jakob H, Nawrath H. Electrophysiologic and inotropic effects of  $\alpha$ -adrenoceptor stimulation in human isolated atrial heart muscle. *Naunyn Schmiedeberg's Arch Pharmacol* 1992;346:82–87.
- [90] Brückner R, Meyer W, Mügge A, Schmitz W, Scholz H. Alpha-adrenoceptor-mediated positive inotropic effect of phenylephrine in isolated human ventricular myocardium. *Eur J Pharmacol* 1984;99:345–347.
- [91] Aass H, Skomedal T, Osnes J-B, et al. Noradrenaline evokes an  $\alpha$ -adrenoceptor-mediated inotropic effect in human ventricular myocardium. *Acta Pharmacol Toxicol* 1986;58:88–90.
- [92] Steinfath M, Danielsen W, Von der Leyen, H. et al. Reduced  $\alpha_1$ -

- and  $\beta_2$ -adrenoceptor-mediated positive inotropic effects in human end-stage heart failure. *Br J Pharmacol* 1992;105:463–469.
- [93] Kohl C, Schmitz W, Scholz H, et al. Evidence for  $\alpha_1$ -adrenoceptor-mediated increase of inositol trisphosphate in the human heart. *J Cardiovasc Pharmacol* 1989;13:324–327.
- [94] Schmitz W, Scholz H, Scholz J, et al. Pertussis toxin does not inhibit the  $\alpha_1$ -adrenoceptor-mediated effect on inositol phosphate production in the heart. *Eur J Pharmacol* 1987;134:377–378.
- [95] Terzic A, Puceat M, Vassort G, Vogel SM. Cardiac  $\alpha_1$ -adrenoceptors: an overview. *Pharmacol Rev* 1993;45:147–175.
- [96] Endoh M. The effects of various drugs on the myocardial inotropic response. *Gen Pharmacol* 1995;26:1–31.
- [97] Bylund DB, Eikenberg DC, Hieble PJ, et al. International Union of Pharmacology: Nomenclature of Adrenoceptors. *Pharmacol Rev* 1994;46:121–136.
- [98] Hirasawa A, Horie K, Tanaka T, et al. Cloning, functional expression and tissue distribution of human cDNA for the  $\alpha_{1C}$ -adrenoceptor. *Biochem Biophys Res Commun* 1993;195:902–909.
- [99] Price DT, Lefkowitz RJ, Caron MG, Berkowitz D, Schwinn DA. Localization of mRNA for three distinct  $\alpha_1$ -adrenergic receptor subtypes in human tissues: implications for human  $\alpha$ -adrenergic physiology. *Mol Pharmacol* 1994;45:171–175.
- [100] Bax WA, Bruinvels AT, van Suylen R-J, Saxena PR, Hoyer D. Endothelin receptors in the human coronary artery, ventricle and atrium: a quantitative autoradiographic analysis. *Naunyn-Schmiedeberg's Arch Pharmacol* 1993;348:403–410.
- [101] Molenaar P, O'Reilly G, Sharkey A, et al. Characterization and localization of endothelin receptor subtypes in human atrioventricular conducting system and myocardium. *Circ Res* 1993;72:526–538.
- [102] Regitz-Zagrosek V, Friedel N, Heymann A, et al. Regulation, chamber localization, and subtype distribution of angiotensin II receptors in human hearts. *Circulation* 1995;91:1461–1471.
- [103] Vogelsang M, Broede-Sitz A, Schäfer E, Zerkowski H-R, Brodde O-E. Endothelin  $ET_A$ -receptors couple to inositol phosphate formation and inhibition of adenylate cyclase in human right atrium. *J Cardiovasc Pharmacol* 1994;23:344–347.
- [104] Schomisch Moravec C, Reynolds EE, Stewart RW, Bond M. Endothelin is a positive inotropic agent in human and rat heart in vitro. *Biochem Biophys Res Commun* 1989;159:14–18.
- [105] Davenport AP, Nunez DJ, Hall JA, Kaumann AJ, Brown MJ. Autoradiographical localization of binding sites for porcine [ $^{125}$ I]endothelin-1 in humans, pigs, and rats: functional relevance in humans. *J Cardiovasc Pharmacol* 1989;13(suppl 5):S166–S170.
- [106] Moody CJ, Dashwood MR, Sykes RM, et al. Functional and autoradiographic evidence for endothelin 1 receptors on human and rat cardiac myocytes. *Circ Res* 1990;67:764–769.
- [107] Pieske B, Kretschmann B, Burmeister C, et al. Influence of isoproterenol and endothelin on intracellular  $Ca^{2+}$ -transients and isometric force in isolated human ventricular myocardium. *Circulation* 1994;88(suppl):1-570(abstract).
- [108] Meyer M, Lehnart S, Pieske B, et al. Influence of endothelin 1 on human atrial myocardium. Myocardial function and subcellular pathways. *Basic Res Cardiol* 1995; in press.
- [109] Schomisch Moravec C, Schluchter MD, Paranandi L, et al. Inotropic effects of angiotensin II on human cardiac muscle in vitro. *Circulation* 1990;82:1973–1984.
- [110] Holubarsch C, Hasenfuss G, Schmidt-Schweda S, et al. Angiotensin I and II exert inotropic effects in atrial but not in ventricular human myocardium. *Circulation* 1993;88:1228–1237.
- [111] Hilal-Dandan R, Urasawa K, Brunton LL. Endothelin inhibits adenylate cyclase and stimulates phosphoinositide hydrolysis in adult cardiac myocytes. *J Biol Chem* 1992;267:10620–10624.
- [112] Takanashi M, Endoh M. Characterization of positive inotropic effects of endothelin on mammalian ventricular myocardium. *Am J Physiol* 1991;261:H611–H619.
- [113] Takanashi M, Endoh M. Concentration- and time-dependence of phosphoinositide hydrolysis induced by endothelin-1 in relation to the positive inotropic effect in the rabbit ventricular myocardium. *J Pharmacol Exp Ther* 1992;262:1189–94.
- [114] Korth M, Köhlkamp V. Muscarinic receptors mediate negative and positive inotropic effects in mammalian ventricular myocardium: differentiation by agonists. *Br J Pharmacol* 1987;90:81–90.
- [115] Kohl C, Schmitz W, Scholz H. Positive inotropic effect of carbachol and inositol phosphate levels in mammalian atria after pretreatment with pertussis toxin. *J Pharmacol Exp Ther* 1990;254:894–899.
- [116] Bristow MR. Changes in myocardial and vascular receptors in heart failure. *J Am Coll Cardiol* 1993;22(suppl 4):61A–71A.
- [117] Chien KR, Knowlton KU, Zhu H, Chien S. Regulation of cardiac gene expression during myocardial growth and hypertrophy: molecular studies of an adaptive physiologic response. *FASEB J* 1991;5:3037–3046.
- [118] Lindpaintner K, Ganten D. The cardiac renin-angiotensin system: an appraisal of present experimental and clinical evidence. *Circ Res* 1991;68:905–921.
- [119] Simpson PC, Karuiya K, Karns LR, Long C, Karliner JS. Adrenergic hormones and control of cardiac myocyte growth. *Mol Cell Biochem* 1991;104:35–43.
- [120] Baker KM, Booz GW, Dostal DE. Cardiac actions of angiotensin II: role of an intracardiac renin-angiotensin system. *Annu Rev Physiol* 1992;54:227–241.
- [121] Knowlton KU, Michel MC, Itani M, et al. The  $\alpha_{1A}$ -adrenoceptor subtype mediates biochemical, molecular, and morphologic features of cultured myocardial cell hypertrophy. *J Biol Chem* 1993;268:15374–15380.
- [122] Sugden PH, Fuller SJ, Mynett JR, et al. Stimulation of adult rat ventricular myocyte protein synthesis and phosphoinositide hydrolysis by the endothelins. *Biochim Biophys Acta* 1993;1175:327–332.
- [123] Milano CA, Dolber PC, Rockman HA, et al. Myocardial expression of a constitutively active  $\alpha_{1B}$ -adrenergic receptor in transgenic mice induces cardiac hypertrophy. *Proc Natl Acad Sci USA* 1994;91:10109–10113.
- [124] Dahlöf B, Pennert K, Hansson L. Reversal of left ventricular hypertrophy in hypertensive patients. A meta analysis of 109 treatment studies. *Am J Hypertens* 1992;5:95–110.
- [125] Brodde O-E. Beta-adrenoceptors in cardiac disease. *Pharmacol Ther* 1994;60:405–430.
- [126] Harding SE, Brown LA, Wynne DG, Davies CH, Poole-Wilson PA. Mechanisms of  $\beta$ -adrenoceptor desensitisation in the failing human heart. *Cardiovasc Res* 1994;28:1451–1460.
- [127] Lohse MJ. Molecular mechanisms of membrane receptor desensitization. *Biochim Biophys Acta* 1993;1179:171–188.
- [128] Ungerer M, Böhm M, Elce JS, Erdmann E, Lohse MJ. Altered expression of  $\beta$ -adrenoceptor kinase and  $\beta_1$ -adrenergic receptors in the failing human heart. *Circulation* 1993;87:454–463.
- [129] Ungerer M, Parruti G, Böhm M, et al. Expression of  $\beta$ -arrestin and  $\beta$ -adrenoceptor kinases in the failing human heart. *Circ Res* 1994;74:206–213.
- [130] Hausdorff WP, Caron MG, Lefkowitz RJ. Turning off the signal: desensitization of  $\beta$ -adrenoceptor function. *FASEB J* 1990;4:2881–2889.
- [131] Zhou X-M, Fishman PH. Desensitization of the human  $\beta_1$ -adrenoceptor. Involvement of the cyclic AMP-dependent but not a receptor-specific protein kinase. *J Biol Chem* 1991;266:7462–7468.
- [132] Böhm M, Reiger B, Schwinger RHG, Erdmann E. cAMP concentrations, cAMP dependent protein kinase activity, and phospholamban in non-failing and failing myocardium. *Cardiovasc Res* 1994;28:1713–1719.
- [133] Denniss AR, Colucci WS, Allen PD, Marsh JD. Distribution and function of human ventricular beta adrenoceptors in congestive heart failure. *J Mol Cell Cardiol* 1989;21:651–660.
- [134] Murphree SS, Saffitz JE. Distribution of  $\beta$ -adrenoceptors in failing human myocardium. Implications for mechanisms of down-regulation. *Circulation* 1989;79:1214–1225.
- [135] Pitschner HF, Droegge A, Mitze M, Schlepper M, Brodde O-E. Down-regulated  $\beta$ -adrenoceptors in severely failing human ventricles: uniform regional distribution, but no increased internalization. *Bas Res Cardiol* 1993;88:179–191.
- [136] Bristow MR, Minobe WA, Reynolds MV, et al. Reduced  $\beta_1$  receptor messenger RNA abundance in the failing human heart. *J Clin Invest* 1993;92:2737–2745.
- [137] Bristow MR, Sandoval AB, Gilbert EM, Deisher T, Minobe W, Rasmussen R. Myocardial  $\alpha$ - and  $\beta$ -adrenoceptors in heart failure: is cardiac-derived norepinephrine the regulatory signal? *Eur Heart J* 1988;9(suppl H):35–40.
- [138] Lands AM, Arnold A, McAuliff JP, Luduena FP, Brown TG.

- Differentiation of receptor systems activated by sympathomimetic amines. *Nature* 1967;214:597–598.
- [139] Hasking GJ, Esler MD, Jennings GL, Burton D, Johns JA, Komer PI. Norepinephrine spillover to plasma in patients with congestive heart failure: evidence of increased overall and cardiorenal sympathetic nervous activity. *Circulation* 1986;73:615–621.
- [140] Snavely MD, Motulsky HJ, Moustafa E, Mahan LC, Insel PA.  $\beta$ -Adrenoceptor subtypes in the rat renal cortex. Selective regulation of  $\beta_1$ -adrenoceptors by pheochromocytoma. *Circ Res* 1982;51:504–513.
- [141] Tsujimoto G, Manger WM, Hoffman BB. Desensitization of  $\beta$ -adrenoceptors by pheochromocytoma. *Endocrinology* 1984;114:1272–1278.
- [142] Lu X, Barnett DB. Differential rates of down regulation and recovery of rat myocardial  $\beta$ -adrenoceptor subtypes in vivo. *Eur J Pharmacol* 1990;182:481–486.
- [143] Ordway GA, Gambarana C, Frazer A. Quantitative autoradiography of central beta-adrenoceptor subtypes: comparison of the effects of chronic treatment with desipramine or centrally administered 1-isoproterenol. *J Pharmacol Exp Ther* 1988;247:379–389.
- [144] Nanoff C, Freissmuth M, Tuisl E, Schutz W. A different desensitization pattern of cardiac  $\beta$ -adrenoceptor subtypes by prolonged in vivo infusion of isoprenaline. *J Cardiovasc Pharmacol* 1989;13:198–203.
- [145] Molenaar P, Smolich JJ, Russell FD, McMartin LR, Summers RJ. Differential regulation of beta-1 and beta-2 adrenoceptors in guinea-pig atrioventricular conducting system after chronic (–)-isoproterenol infusion. *J Pharmacol Exp Ther* 1990;255:393–400.
- [146] Kompa AR, Molenaar P, Summers RJ. Effect of chemical sympathectomy on (–)-isoprenaline induced changes in cardiac  $\beta$ -adrenoceptor subtypes in the guinea-pig and rat. *J Auton Pharmacol* 1994;14:411–423.
- [147] Kompa AR, Molenaar P, Summers RJ. Regulation of guinea-pig cardiac  $\beta$ -adrenoceptor subtypes after (–)-adrenaline and (–)-noradrenaline treatment. *Mol Neuropharmacol* 1992;1:203–210.
- [148] Zhao M, Muntz KH. Differential downregulation of  $\beta_2$ -adrenoceptors in tissue compartments of rat heart is not altered by sympathetic denervation. *Circ Res* 1993;73:943–951.
- [149] Amenta F, Coppola L, Gallo P, et al. Autoradiographic localization of  $\beta$ -adrenergic receptors in human large coronary arteries. *Circ Res* 1991;68:1591–1599.
- [150] Ferro A, Kaumann AJ, Brown MJ.  $\beta$ -Adrenoceptor subtypes in human coronary artery: desensitization of  $\beta_2$ -adrenergic vasorelaxation by chronic  $\beta_1$ -adrenergic stimulation in vitro. *J Cardiovasc Pharmacol* 1995;25:134–141.
- [151] Feldman AM, Cates AE, Veazey WB, et al. Increase in the 40,000-mol wt pertussis toxin substrate (G-protein) in the failing human heart. *J Clin Invest* 1988;82:189–197.
- [152] Neumann J, Schmitz W, Scholz H, von Meyerinck L, Döring V, Kalmar P. Increase of myocardial  $G_i$ -proteins in human heart failure. *Lancet* 1988;ii:936–937.
- [153] Feldman AM, Jackson DG, Bristow MR, Cates AE, van Dop C. Immunodetectable levels of the inhibitory guanine nucleotide binding regulatory proteins in failing human heart: discordance with measurements of adenylyl cyclase activity and levels of pertussis toxin substrate. *J Mol Cell Cardiol* 1991;23:439–452.
- [154] Bristow MR, Anderson FL, Port JD, et al. Differences in  $\beta$ -adrenergic neuroeffector mechanisms in ischemic versus idiopathic dilated cardiomyopathy. *Circulation* 1991;84:1024–1039.
- [155] Feldman AM, Cates AE, Bristow MR, Van Dop C. Altered expression of  $\alpha$ -subunits of G proteins in failing human hearts. *J Mol Cell Cardiol* 1989;21:359–365.
- [156] Feldman AM, Ray PE, Bristow MR. Expression of  $\alpha$ -subunits of G proteins in failing human heart: a reappraisal utilizing polymerase chain reaction. *J Mol Cell Cardiol* 1991;23:1355–1358.
- [157] Eschenhagen T, Mende U, Nose M, et al. Increased messenger RNA level of the inhibitory G-protein  $\alpha$ -subunit  $G_{i\alpha-2}$  in human end-stage heart failure. *Circ Res* 1992;70:688–696.
- [158] Böhm M, Eschenhagen T, Gierschik P, et al. Radioimmunochemical quantification of  $G_{i\alpha}$  in right and left ventricles from patients with ischaemic and dilated cardiomyopathy and predominant left ventricular failure. *J Mol Cell Cardiol* 1994;26:133–149.
- [159] Brown LA, Harding SE. The effect of pertussis toxin on  $\beta$ -adrenoceptor responses in isolated cardiac myocytes from noradrenaline-treated guinea-pigs and patients with cardiac failure. *Br J Pharmacol* 1992;106:115–122.
- [160] Maisel AS, Michel MC, Insel PA, Ennis C, Ziegler MG, Phillips C. Pertussis toxin treatment of whole blood. A novel approach to assess G protein function in congestive heart failure. *Circulation* 1990;81:1198–1204.
- [161] Reithmann C, Gierschik P, Sidiropoulos D, Werdan K, Jakobs KH. Mechanism of noradrenaline-induced heterologous desensitization of adenylyl cyclase stimulation in rat heart muscle cells: increase in the level of inhibitory G-protein  $\alpha$ -subunits. *Eur J Pharmacol* 1989;172:211–221.
- [162] Mende U, Eschenhagen T, Geertz B, et al. Isoprenaline-induced increase in the 40/41 kDa pertussis toxin substrates and functional consequences on contractile response in rat heart. *Naunyn-Schmiedeberg's Arch Pharmacol* 1992;345:44–50.
- [163] Eschenhagen T, Mende U, Nose M, et al. Isoprenaline-induced increase in mRNA levels of inhibitory G-protein  $\alpha$ -subunits in rat heart. *Naunyn-Schmiedeberg's Arch Pharmacol* 1991;343:609–615.
- [164] Eschenhagen T, Mende U, Nose M, et al. Long term  $\beta$ -adrenoceptor-mediated upregulation of  $G_{i\alpha}$ - $G_{o\alpha}$ -mRNA levels and pertussis toxin sensitive G-proteins in rat heart. *Mol Pharmacol* 1992;42:773–783.
- [165] Weinstein JS, Spiegel AM, Carter AD. Cloning and characterization of the human gene for the  $\alpha$ -subunit of  $G_{i2}$ , a GTP-binding signal transduction protein. *FEBS Lett* 1988;232:333–340.
- [166] Hadcock JR, Ros M, Watkins DC, Malbon CC. Cross-regulation between G-protein mediated pathways. *J Biol Chem* 1990;265:14784–14790.
- [167] Kozasa T, Itoh H, Tsukamoto T, Kaziro Y. Isolation and characterization of the human  $G_{s\alpha}$  gene. *Proc Natl Acad Sci USA* 1988;85:2081–2085.
- [168] Brodde O-E. Clinical significance of  $\beta$ -adrenoceptors. *Pharmacol Commun* 1995;6:259–267.
- [169] Brodde O-E, Michel-Reher M, Oefler D, Sarikouch S, Michel MC. Terbutaline-induced downregulation of  $\beta_2$ -adrenoceptors without  $G_i$ -protein alterations in human lymphocytes. *J Cardiovasc Pharmacol* 1992;20:785–789.
- [170] Michel MC, Feth F, Sundermann M, Rascher W, Brodde O-E.  $\beta$ -Adrenoceptor desensitization in SK-N-MC cells, a human cell line containing a homogeneous population of  $\beta_1$ -adrenoceptors. *J Auton Pharmacol* 1993;13:425–438.
- [171] Reithmann C, Gierschik P, Werdan K, Jakobs KH. Tumor necrosis factor  $\alpha$  up-regulates  $G_{i\alpha}$  and  $G_{\beta}$  proteins and adenylyl cyclase responsiveness in rat cardiomyocytes. *Eur J Pharmacol* 1991;206:53–60.
- [172] Levine B, Kalman J, Mayer L, Fillit HM, Packer M. Elevated circulating levels of tumor necrosis factor in severe chronic heart failure. *N Engl J Med* 1990;323:236–241.
- [173] Bristow MR, Minobe W, Rasmussen R, et al.  $\beta$ -Adrenergic neuroeffector abnormalities in the failing human heart are produced by local rather than systemic mechanisms. *J Clin Invest* 1992;89:803–815.
- [174] Tang WJ, Gilman AG. Adenylyl cyclase. Mini review. *Cell* 1992;70:869–872.
- [175] Cooper DMF, Mons N, Fagan K.  $Ca^{2+}$ -sensitive adenylyl cyclase. Mini review. *Cell Sign* 1994;6:823–840.
- [176] Taussig R, Gilman AG. Mammalian membrane-bound adenylyl cyclases. Mini review. *J Biol Chem* 1995;270:1–4.
- [177] Ishikawa Y, Sorota S, Kiuchi K, et al. Downregulation of adenylyl cyclase types V and VI mRNA levels in pacing-induced heart failure in dogs. *J Clin Invest* 1994;93:2224–2229.
- [178] Tobise K, Ishikawa Y, Holmer SR, et al. Changes in type VI adenylyl cyclase isoform expression correlate with a decreased capacity for cAMP generation in the aging ventricle. *Circ Res* 1994;74:596–603.
- [179] Feldman MD, Copelas L, Gwathmey J, et al. Deficient production of cyclic AMP: pharmacologic evidence of an important cause of contractile dysfunction in patients with end-stage heart failure. *Circulation* 1987;75:331–339.

- [180] Docherty JR. Cardiovascular responses in ageing: a review. *Pharmacol Rev* 1990;42:103–125.
- [181] Lakatta EG. Cardiovascular regulatory mechanisms in advanced age. *Physiol Rev* 1993;73:413–467.
- [182] Brodde O-E, Zerkowski H-R, Schranz D, et al. Age-dependent changes of the  $\beta$ -adrenoceptor-G-protein(s)-adenylyl cyclase system in human right atrium. *J Cardiovasc Pharmacol* 1995;26:20–26.
- [183] White M, Roden R, Minobe W, et al. Age-related changes in  $\beta$ -adrenergic neuroeffector systems in the human heart. *Circulation* 1994;90:1225–1238.
- [184] Böhm M, Ungerer M, Erdmann E. Beta adrenoceptors and muscarinic receptors in myocardium of hearts with coronary artery disease or idiopathic dilated cardiomyopathy removed at cardiac transplantation. *Am J Cardiol* 1990;66:880–882.
- [185] Insel PA. GTP-binding proteins and post-receptor components in hypertension. *Pharmacol Toxicol* 1992;70(suppl II):s28–s31.
- [186] Vago T, Bevilacqua M, Norbiato G, et al. Identification of  $\alpha_1$ -adrenergic receptors on sarcolemma from normal subjects and patients with idiopathic dilated cardiomyopathy: characteristics and linkage to GTP-binding protein. *Circ Res* 1989;64:474–481.
- [187] Morris GM, Hadcock JR, Malbon CC. Cross-regulation between G-protein-coupled receptors: activation of  $\beta_2$ -adrenergic receptors increases  $\alpha_1$ -adrenoceptor mRNA levels. *J Biol Chem* 1991;266:2233–2238.
- [188] Mügge A, Reupcke Ch, Scholz H. Increased myocardial  $\alpha_1$ -adrenoceptor density in rats chronically treated with propranolol. *Eur J Pharmacol* 1985;112:249–252.
- [189] Steinkraus V, Nose M, Scholz H, Thormählen K. Time course and extent of  $\alpha_1$ -adrenoceptor density changes in rat heart after beta-adrenoceptor blockade. *Br J Pharmacol* 1989;96:441–449.
- [190] Pieske B, Meyer M, Schlöthauer K, et al. Inotropic effect of endothelin in human ventricular myocardium. *J Mol Cell Cardiol* 1994;26:385(abstract).
- [191] Urata H, Healy B, Stewart RW, Bumpus FM, Husain A. Angiotensin II receptors in normal and failing human hearts. *J Clin Endocrinol Metab* 1989;69:54–66.
- [192] Fan THM, Liang CS, Kawashima S, Banerjee SP. Alterations in cardiac beta-adrenoceptor responsiveness and adenylyl cyclase system by congestive heart failure in dogs. *Eur J Pharmacol* 1987;140:123–132.
- [193] Calderone A, Bouvier M, Li K, Juneau C, deChamplain J, Rouleau J-L. Dysfunction of the  $\beta$ - and  $\alpha$ -adrenergic system in a canine model of congestive heart failure. *Circ Res* 1991;69:332–343.
- [194] Marzo KP, Frey MJ, Wilson JR, Liang BT, Manning DR, Lanoce V, Molinoff PB.  $\beta$ -Adrenergic receptor-G protein-adenylyl cyclase complex in experimental canine congestive heart failure produced by rapid ventricular pacing. *Circ Res* 1991;69:1546–1556.
- [195] Roth DA, Urasawa K, Helmer GA, Hammond HK. Downregulation of cardiac guanosine 5'-triphosphate-binding proteins in right atrium and left ventricle in pacing-induced congestive heart failure. *J Clin Invest* 1993;91:939–949.
- [196] Ping P, Hammond HK. Diverse G protein and  $\beta$ -adrenergic receptor mRNA expression in normal and failing porcine hearts. *Am J Physiol Soc* 1994;267:H2079–H2085.
- [197] Hammond HK, Roth DA, Insel PA, et al. Myocardial  $\beta$ -adrenergic receptor expression and signal transduction after chronic volume-overload hypertrophy and circulatory congestion. *Circulation* 1992;85:269–280.
- [198] Gilson N, Bouanani NEH, Corsin A, Crozatier B. Left ventricular function and  $\beta$ -adrenoceptors in rabbit failing heart. *Am J Physiol Soc* 1990;258:H634–H641.
- [199] Chastaney EA, Liang CS, Hood WB Jr. Beta adrenoceptor and adenylyl cyclase function in the infarct model of heart failure. *Proc Soc Exp Biol Med* 1992;200:90–94.
- [200] Karliner JS, Stevens M, Grattan M, Woloszym W, Honbo N, Hoffman JIE. Beta adrenergic receptor properties of canine myocardium: effects of chronic myocardial infarction. *J Am Coll Cardiol* 1986;8:349–356.
- [201] Kessler PD, Cates AE, Van Dop C, Feldman AM. Decreased bioactivity of the guanine nucleotide-binding protein that stimulates adenylyl cyclase in hearts from cardiomyopathic Syrian hamsters. *J Clin Invest* 1989;84:244–252.
- [202] Seiti R, Bector N, Takeda N, Nagano M, Jasmin G, Dhalla NS. Alterations in G-proteins in congestive heart failure in cardiomyopathic (UM-X7.1) hamsters. *Mol Cell Biochem* 1994;140:163–170.
- [203] Karliner JS, Barnes P, Brown M, Dollery C. Chronic heart failure in the guinea pig increases cardiac  $\alpha_1$  and  $\beta$ -adrenoceptors. *Eur J Pharmacol* 1980;67:115–118.
- [204] Vatner DE, Homcy CJ, Sit SP, Manders WT, Vatner SF. Effects of pressure overload, left ventricular hypertrophy on  $\beta$ -adrenergic receptors, and responsiveness to catecholamines. *J Clin Invest* 1984;73:1473–1482.
- [205] Vatner DE, Vatner SF, Fujii AM, Homcy CJ. Loss of high affinity cardiac beta adrenergic receptors in dogs with heart failure. *J Clin Invest* 1985;76:2259–2264.
- [206] Longabaugh JP, Vatner DE, Vatner SF, Homcy CJ. Decreased stimulatory guanosine triphosphate binding protein in dogs with pressure-overload left ventricular failure. *J Clin Invest* 1988;81:420–424.
- [207] Katoh Y, Komuro I, Takaku T, Yamaguchi H, Yazaki Y. Messenger RNA levels of guanine nucleotide-binding proteins are reduced in the ventricle of cardiomyopathic hamsters. *Circ Res* 1990;67:235–239.
- [208] Homcy CJ, Vatner SF, Vatner DE.  $\beta$ -Adrenergic receptor regulation in the heart in pathophysiologic states: abnormal adrenergic responsiveness in cardiac disease. *Annu Rev Physiol* 1991;53:137–159.
- [209] Houslay MD. "Crosstalk": a pivotal role of protein kinase C in modulating relationships between signal transduction pathways. *Eur J Biochem* 1991;195:9–27.
- [210] Michel MC, Pingsmann A, Beckeringh JJ, Zerkowski H-R, Doetsch N, Brodde O-E. Selective regulation of  $\beta_1$ - and  $\beta_2$ -adrenoceptors in the human heart by chronic  $\beta$ -adrenoceptor antagonist treatment. *Br J Pharmacol* 1988;94:685–692.
- [211] Motomura S, Deighton NM, Zerkowski H-R, Doetsch N, Michel MC, Brodde O-E. Chronic  $\beta_1$ -adrenoceptor antagonist treatment sensitizes  $\beta_2$ -adrenoceptors, but desensitizes  $M_2$ -muscarinic receptors in the human right atrium. *Br J Pharmacol* 1990;101:363–369.
- [212] Hall JA, Kaumann AJ, Brown MJ. Selective  $\beta_1$ -adrenoceptor blockade enhances positive inotropic responses to endogenous catecholamines mediated through  $\beta_2$ -adrenoceptors in human atrial myocardium. *Circ Res* 1990;66:1610–1623.
- [213] Hall JA, Petch MC, Brown MJ. In vivo demonstration of cardiac  $\beta_2$ -adrenoceptor sensitization by  $\beta_1$ -antagonist treatment. *Circ Res* 1991;69:959–964.
- [214] Schnabel P, Böhm M, Gierschik P, Jakobs K-H, Erdmann E. Improvement of cholera toxin-catalyzed ADP-ribosylation by endogenous ADP-ribosylation factor from bovine brain provides evidence for an unchanged amount of  $G_{s\alpha}$  in failing human myocardium. *J Mol Cell Cardiol* 1990;22:73–82.
